---

1                   **Genome-wide analysis reveals genetic diversity, linkage**  
2                   **disequilibrium, and selection for milk traits in Chinese buffalo breeds**

3                   **Xing-Rong Lu<sup>¶</sup>, An-Qin Duan<sup>¶</sup>, Sha-Sha Liang, Xiao-Ya Ma, Xian-Wei Liang, and**  
4                   **Ting-Xian Deng<sup>1\*</sup>**

5                   <sup>1</sup>Key Laboratory of Buffalo Genetics, Breeding and Reproduction Technology, Buffalo  
6                   Research Institute, Chinese Academy of Agricultural Sciences, Nanning, China

7                   \*Corresponding author: Ting-Xian Deng

8                   E-mail: dtx282000@163.com

9                   <sup>¶</sup>These authors contributed equally to this work.

10

11                   **Abstract**

12                   Water buffalo holds the tremendous potential of milk and meat that widespread  
13                   throughout central and southern China. However, characterization of the population  
14                   genetics of Chinese buffalo is poorly understood. Using Axiom<sup>®</sup> buffalo genotyping  
15                   array, we performed the genetic diversity, linkage disequilibrium (LD) pattern and  
16                   signature of selection in the 176 Chinese buffaloes from thirteen breeds. A total of  
17                   35,547 SNPs passed quality control and were used for further analyses. Population  
18                   genetic analysis revealed a clear separation between the swamp and river types. Ten  
19                   Chinese indigenous breeds clustered into the swamp group, Murrah and Nili-Ravi  
20                   breeds were the river group, and the crossbred breed was closer to the river group.  
21                   Genetic diversity analysis showed that the swamp group had a lower average expected  
22                   heterozygosities compared to the river group. LD decay distance was much shorter in  
23                   the swamp group compared with the river group with  $r_{0.2}^2$  value of approximately 50  
24                   Kb. Analysis of runs of homozygosity indicated that extensive remote and recent  
25                   inbreeding activity was respectively found within swamp and river groups. Moreover,  
26                   a total of 12 genomic regions under selection were detected between river and swamp  
27                   groups. Further, 12 QTL regions were found associated with buffalo milk production  
28                   traits. Some candidate genes within these QTLs were predicted to be involved in the

29 cell structure and function, suggesting that these genes might play vital roles in the  
30 buffalo milk performance. Our data contribute to our understanding of the  
31 characterization of population genetics in Chinese buffaloes, which in turn may be  
32 utilized in buffalo breeding programs.

### 33 **Author Summary**

34 Identifying the causal genes or markers associated with important economic traits in  
35 livestock is critical to increasing the production level on the species. However, current  
36 understanding of the genetic basis for milk production traits in buffalo is limited.  
37 Here, we confirmed the divergent evolution, distinct population structure, and LD  
38 extent among Chinese buffalo breeds. We also identified 12 QTL regions associated  
39 with milk production traits in buffaloes using the selective sweeps and haplotype  
40 analysis. Further, a total of 7 genes involved in the cell structure and function were  
41 predicted within the identified QTLs. These findings suggested that these genes can  
42 serve as the candidate genes associated with buffalo milk production, which hold a  
43 vital role in the milk trait improvement of dairy buffalo industry.

### 44 **Introduction**

45 Water buffalo (*Bubalus bubalis*), primarily raised for milk, meat and draught power,  
46 is an essential part of the agricultural economy of many countries around the world.  
47 Broadly, buffalo mainly consists of two types: the river (*B. bubalis bubalis*; n=50) and  
48 swamp (*B. bubalis carabensis*; n=48), which are primarily distinguished based on  
49 their distinct morphology and chromosomal karyotypes [1]. In China, the indigenous  
50 buffaloes were mainly the swamp type, with the largest number of swamp population  
51 across the world. To date, Chinese swamp buffaloes have been classed into 24 local  
52 types based mainly on the regional distribution [2]. To improve the milk and meat  
53 performance of swamp buffalo, crossbred buffalo by hybridizing the river-type bulls  
54 with swamp-type cows has been practiced in many Asian countries, and they are  
55 fertile, although the hybrid may have a lower reproductive value [3, 4]. The cross-  
56 breeding programs in China began in the 1950s by introducing the exotic river breeds

57 such as Murrah and Nili-Ravi, which has resulted in the different crossbred breeds  
58 including the Murrah × local buffalo, Nili-Ravi × indigenous buffalo, and Murrah ×  
59 Nili-Ravi × indigenous buffalo. These animals have higher milk production (~1,700  
60 kg per lactation) than that of swamp buffalo (~500-800 kg per lactation) after multiple  
61 cross breeding for several decades, which is still lower than that of the river buffalo  
62 breeds (~2,200 kg/lactation) [5]. Therefore, it is of great interest to genetically dissect  
63 the molecular basis of buffalo complex traits such as milk and meat, which contribute  
64 to the development of dairy buffalo industry.

65 Knowledge of genetic diversity within and among breeds and populations is  
66 crucial for their domestication, conservation, and management. In the past few  
67 decades, two independent domestication events of the river and swamp buffaloes were  
68 confirmed using the Y-chromosomal [6] and mitochondrial DNA [7] technologies.  
69 River buffalo was domesticated in the western region of the Indian subcontinent [8],  
70 while swamp buffalo was domesticated in the border between Indochina and  
71 Southwestern China occurred 4000 years ago [9, 10]. More importantly, a robust  
72 geographic differentiation was found within the swamp buffaloes [9], and the  
73 Southwestern buffalo populations in China had the highest genetic diversity compared  
74 to the other domestication centers (Central and Southwestern China) [11]. These  
75 domestication events, including the natural and artificial selection, help to shape and  
76 stabilize the buffalo breed characteristics. For example, river buffalo is well known to  
77 be a breed that is mainly used for milk and meat production, while swamp buffalo is  
78 essentially a draught animal with lower milk production. With the acceleration of  
79 urbanization, however, swamp buffalo population in China shows a rapid decline  
80 trend in recent years, especially some endangered swamp breeds emerged. It is well  
81 known that a drop in population size may generally cause the decline of genetic  
82 diversity by genetic drift and inbreeding [12]. Because of genetic diversity underpins  
83 population resilience and persistence, it is of considerable importance to investigate

84 the genetic diversity of swamp buffalo breed in China. These results will play a vital  
85 role in the buffalo genetic improvement, particularly in its breeding programs.

86 In the last decade, genome/transcriptome-wide molecular markers were identified  
87 using high-throughput sequencing [13-15], which can be utilized for animal breeding  
88 and genetic studies. Deng et al. [16] identified 17,401 simple sequence repeats (SSRs)  
89 in swamp buffalo that could be used as potential molecular markers by the Illumina  
90 paired-end technology that could help spearhead molecular genetics research studies  
91 on this species. Single nucleotide polymorphism (SNP) is another critical marker that  
92 can be used in genetic diversity studies or genetic mapping. Various genotyping  
93 techniques have also been developed for SNP discovery, ranging from the low-  
94 throughput allele-specific PCR [17] to high-throughput methods of genotyping  
95 hundreds of thousands of SNPs in parallel [18]. To date, high-throughput SNP  
96 genotyping has been extensively applied to various domestic animals [19-21] and  
97 plants [22]. The first SNP genotyping platform (Axiom® buffalo genotyping array;  
98 90K Affymetrix) designed explicitly for river buffalo has recently been developed  
99 [23] and used for the genome-wide analysis study (GWAS) in different buffalo breeds  
100 [24-26]. This SNP90K array provides a viable choice for buffalo scientific research  
101 such as molecular breeding, complex traits, conservation, and biodiversity.

102 Several methods have been developed to detect signatures of recent selection in  
103 domesticated animals [27]. These methods mainly based on the linkage disequilibrium  
104 (LD), spectra of allele frequencies, and characteristics of haplotype structures in the  
105 studied populations [28]. Notably, identifying signatures of selection could provide  
106 insight into the genomic response to domestication and selection for production traits,  
107 which help in the design of more efficient selection schemes [29]. To date, numbers  
108 selective sweep regions associated with production traits has been identified in  
109 domesticated animals, such as milk production traits [30], reproductive traits [31],  
110 feed efficiency [32], elongation of the back [33], and lack of horns [34]. For the Azeri  
111 and Khuzestani buffalo breeds, Mokhber et al. [35] identified 13 selective sweep

---

112 regions that are potentially related to economically important traits using the genome-  
113 wide SNP data. However, the selection footprints among the Chinese buffalo breeds  
114 remain unexplored. Therefore, we investigated thirteen buffalo breeds in South China  
115 region using the buffalo SNP90K array, aiming to explore the genetic diversity, LD  
116 extent, signature of selection and quantitative trait locus (QTL) among the studied  
117 breeds, which will benefit in the development of an SNP genotyping panel for swamp  
118 buffalo and promote the buffalo complex traits research and breeding program.

## 119 **Results**

### 120 **SNP Characteristics**

121 Statistic information on 176 buffaloes representing 13 breeds was summarized in  
122 **Table 1**. SNP information regarding the chromosomes, numbers, and length was  
123 listed in the **S1 Table**. A total of 35,547 SNPs was generated after filtering that  
124 covered 1309.75 Mb with an average distance of 36.84 Kb between adjacent SNPs.  
125 The average chromosomal length ranged from 21.97 Mb on Chr24 to 102.63 Mb on  
126 Chr1. The mean length of adjacent SNPs per chromosome ranged between 32.69 to  
127 54.63 Kb on Chr19 and ChrX, respectively. The average LD was 0.21 across the  
128 buffalo genome.

### 129 **Population analysis**

130 Principal components analysis (PCA) showed a distinct separation between the river  
131 and swamp types (**Fig 1A**). The crossbred buffaloes were originated from the swamp-  
132 and river-type buffaloes and were concordantly located between them. Similar genetic  
133 relationship among analyzed breeds was also supported by phylogenetic analysis (**Fig**  
134 **1B**) and population structure analysis (**Fig 1C**). As showed in **Fig 1C**, K=2  
135 represented the most appropriate population number for the present dataset, indicating  
136 that there was an apparent differential distribution between river and swamp types.  
137 This suggested that the studied buffalo breeds can be divided into two groups (river  
138 and swamp) for further analysis.

### 139 **Genetic diversity**

140 Distribution of 5 minor allele frequency (MAF) classes between river and swamp  
141 groups were presented in **Fig 2**. Compared to the river group, buffalo breeds in  
142 swamp group had the highest proportion of SNPs with lower MAF category (0, 0.1].  
143 Buffalo breeds in river group had a relatively high proportion of SNPs with high MAF  
144 (mostly (0.2, 0.3], (0.3, 0.4], and (0.4, 0.5]).

145 Genome-wide genetic diversity metrics within breeds were measured by the  
146 observed heterozygosity ( $H_O$ ), expected heterozygosity ( $H_e$ ), and allelic richness ( $A_R$ )  
147 (**Table 1**). Overall, buffaloes in river group displayed a comparably high level of  
148 polymorphism SNPs (50.87%) compared to the swamp group (37.99%). They had  
149 higher genetic diversity compared to the swamp group, as measured by the  $H_O$  ( $0.429$   
150  $\pm 0.11$  vs.  $0.167 \pm 0.18$ ) and  $H_e$  ( $0.436 \pm 0.08$  vs.  $0.174 \pm 0.19$ ). The average  
151 heterozygosity estimates were highest for Murrah breed in the river group ( $H_O$ :  $0.446$   
152  $\pm 0.17$ ;  $H_e$ :  $0.427 \pm 0.11$ ) and lowest for DEC breed in swamp group ( $H_O$ :  $0.250 \pm$   
153  $0.19$ ;  $H_e$ :  $0.250 \pm 0.17$ ). The allelic richness for swamp group ( $A_R = 1.740$ ) was lower  
154 than that of the river group ( $A_R = 1.994$ ). Notably, the DEC breed in swamp group  
155 was observed to have the lowest  $A_R$  ( $A_R = 1.556$ ), while the XIL breed revealed the  
156 lowest  $A_R$  ( $A_R = 1.354$ ).

157 Population differentiation estimates showed that the pairwise  $F_{ST}$  values ranged  
158 from 0.0076 to 0.7535 across the studied breeds (**S2 Table**). For the swamp group,  
159 HUN was most closely related to FUZ ( $F_{ST} = 0.0087$ ), GUI ( $F_{ST} = 0.0092$ ), YIB ( $F_{ST}$   
160  $= 0.0100$ ), ENS ( $F_{ST} = 0.0128$ ), FUL ( $F_{ST} = 0.0129$ ), YAN ( $F_{ST} = 0.0148$ ), DEC ( $F_{ST}$   
161  $= 0.0189$ ), XIL ( $F_{ST} = 0.0229$ ), and DEH ( $F_{ST} = 0.0498$ ). For the river group,  
162 crossbreds showed a close relationship with the Murrah ( $F_{ST} = 0.0542$ ) and Nili-Ravi  
163 ( $F_{ST} = 0.0724$ ) breeds.

#### 164 **Linkage disequilibrium and Autozygosity Segments**

165 Overall estimated LD between river and swamp groups was different in the present  
166 study (**Fig 3A**). Compared to the river group ( $r^2 = 0.61$ ), the highest maximum average  
167 LD ( $r^2 = 0.88$ ) was found within the swamp group. As expected, LD declined as the

---

168 physical distance between pairwise SNPs. LD decay in swamp group had declined  
169 markedly compared with the river group. The average distance when LD decay  
170 dropped to the value of 0.2 was approximately 15 Kb for swamp and 50 Kb for river  
171 group, respectively.

172 To estimate the recent inbreeding, we performed the genome-wide autozygosity  
173 analysis with the runs of homozygosity (ROH) between river and swamp groups. The  
174 result showed that buffaloes in swamp group had higher overall levels of  $F_{ROH}$  than  
175 that of river group (**Fig 3B**). Moreover, we also estimated the ROH distribution by the  
176 length between the river and swamp groups (**S1 Fig**). The results showed that the  
177 difference in genetic diversity was found between river and swamp group. Buffaloes  
178 in swamp group had the lower fraction of ROH in short tract (0-2 Mb), while the river  
179 breed exhibit a higher fraction of ROH in long tract (>16 Mb).

#### 180 **Signatures of selection**

181 The hapFLK statistic that accounted for the haplotype information and hierarchical  
182 structure [36, 37] was used to identify selection footprints on the contrast model (river  
183 vs. swamp). HapFLK analyses revealed that a total of 12 genomic regions was  
184 identified (**Fig 4**). These regions were located on chromosomes 1 (197,939,132-  
185 201,746,066 Kb), 2 (84,613,461-91,314,070 Kb), 8 (80,317,117-88,124,162 and  
186 96,080,274-98,588,633 Kb), 11 (25,584,886-27,617,098 Kb), 12 (15,979,826-  
187 16,215,148 Kb), 15 (7,435,513-13,248,436 Kb), 16 (64,367,119-69,995,014,  
188 70,024,989-79,994,535, and 80,043,731-83,241,865 Kb), 19 (69,537,494-71,631,407  
189 Kb), and 24 (12,608,124-13,746,779 Kb). **Table 2** summarizes the annotation  
190 information of outlier SNPs within the contrast model. The candidate selective sweep  
191 regions ranged from 0.24 Mb to 9.97 Mb on Chr12 and Chr16, respectively.

192 The average length of the candidate regions was 4.24 Mb. The largest number of  
193 SNPs (35) within a genomic region was found in Chr15 with a length of 5.81 Mb.  
194 Notably, a total of 12 top significantly SNPs was identified, corresponding to the 8  
195 candidate genes and one lncRNA (LOC112579725) fragment.



---

## 196 Identification of QTLs

197 To further identify the QTLs associated with milk production traits in buffaloes, we  
198 firstly performed the haplotypes analysis using a 0.5-Mb window around the top  
199 significantly SNPs (**Fig 5**). The results showed that a total of 18 blocks was identified  
200 and located on chromosomes 8, 11, 12, 16, 19, and 24, respectively. For them, a total  
201 of 4 blocks (11\_Block2, 12\_Block2, 16\_Block1, and 19\_Block5) was found to have  
202 the top significantly SNPs. The largest length of blocks was the 19\_Block5 with the  
203 length of 264 Kb. The haplotype association analysis revealed that a total of 12 blocks  
204 was identified to be associated with milk production traits (**Table 3**). Interestingly, 3  
205 blocks (11\_Block2, 19\_Block3, and 19\_Block4) had significantly genetic effects on  
206 all milk traits in buffaloes ( $P < 0.05$ ). The 8\_Block2, 12\_Block2, and 19\_Block1 were  
207 shown to be associated with milk protein percentage (PP) and fat percentage (FP) in  
208 buffaloes ( $P < 0.05$ ). Moreover, we found that a total of 6 blocks (8\_Block3,  
209 12\_Block1, 16\_Block1, 19\_Block2, 19\_Block5, and 24\_Block1) were associated with  
210 milk yield (MY), fat yield (FY) or protein yield (PY) in buffaloes ( $P < 0.05$ ).

211 For the blocks harbored the top significantly SNPs, we further performed the  
212 haplotype combination analysis in the present study (**Table 4**). Bonferroni analysis  
213 revealed that buffaloes with diplotype H2H2 in 12\_Block2 were highest significantly  
214 associated with FP and PP than the other diplotype ( $P < 0.05$ ). In the 11\_Block2, the  
215 individuals with diplotype H1H3 showed a higher MY, FY, and PY compared to  
216 other diplotypes, while the diplotype H3H4 and H1H2 had the highest peak milk yield  
217 (PM) and fat or protein percentages ( $P < 0.05$ ), respectively. For 16\_Block1,  
218 buffaloes with diplotype H2H2 had highest significantly associated with PM, FY, and  
219 PY, while the diplotype H1H4 exhibited the highest genetic effect on MY ( $P < 0.05$ ).  
220 Moreover, these buffaloes with the diplotype H2H4 in 19\_Block5 displayed a higher  
221 PM, MY, FY, and PY compared to other diplotypes ( $P < 0.05$ ).

222 As shown in **Table 5**, a total of 7 genes and 1 lncRNA were predicted. For them,  
223 the *SLC9A3*, *EXOC3*, *AHRR*, *CEP72*, *PRB1*, and *TPPP* genes in 19\_Block5, while



---

224 *FUT8* and LOC112587805 in 11\_Block2, were served as the candidate genes  
225 associated with buffalo milk production traits. However, no candidate gene was  
226 discovered within the 12\_Block2 and 16\_Block1 regions.

## 227 **Discussion**

228 China is rich in buffalo resources that are mainly distributed in 18 provinces in the  
229 central and south regions of the country. The Chinese buffalo breeds have a lower  
230 milk production in comparison with river buffalo breeds. In this work, we performed a  
231 population analysis of thirteen buffalo breeds in South China. PCA and phylogenetic  
232 analysis both showed that two distinct clusters formed without overlap among the  
233 studied breeds; ten indigenous Chinese buffaloes were clustered into the swamp  
234 group, Murrah and Nili-Ravi breeds were grouped into the river group, while the  
235 crossbred was concordantly located between the two groups. Population structures  
236 analysis further showed that there was significant admixture, showing that the breeds  
237 are genetically distinct between river and swamp groups. In this regard, we further  
238 investigated the genetic diversity, LD and ROH, signatures of selection, and  
239 identification of QTLs on the contrast model: the river (high milk production) vs.  
240 swamp (low milk production) groups. These help in the understanding of the genetic  
241 basis of milk production traits in dairy buffaloes, which promote the development of  
242 dairy buffalo industry.

243 Using the medium density SNP chip data, we found that buffalo breeds in swamp  
244 group had lower genetic diversity than that of the river group based on heterozygosity  
245 measures. Similar results were also reported by Colli et al. [10]. In fact, Chinese  
246 indigenous breeds sustain higher levels of genetic variability than river breeds. The  
247 assumption was supported by previous reports that utilized microsatellite markers [38-  
248 40] and mtDNA [41, 42]. This can be explained by the current buffalo 90K array is  
249 optimized for use in four river buffalo breeds (Mediterranean, Murrah, Nili-Ravi, and  
250 Jaffarabadi buffaloes) and has the lower representation of swamp breeds [43]. The  
251 disproportionate distribution of MAF between river and swamp groups is another

---

252 reason to influence the SNP ascertainment bias. For example, buffalo breeds in  
253 swamp group had the highest proportion of SNPs with lower MAF category compared  
254 to the river group. The relatively high proportion of SNPs with high MAF in the  
255 Chinese crossbred buffalo can be attributed to the fact that these buffaloes were recent  
256 crossbreeds with a significantly high inheritance of Murrah and Nili-Ravi breeds  
257 ancestry. Moreover, we also observed differences in the genetic differentiation among  
258 the studied breeds. As expected  $F_{ST}$  among the swamp breeds was lower than the river  
259 and crossbred breeds, ranging from 0.0076 to 0.7535, suggesting a lack of  
260 differentiation among Chinese swamp breeds. This was lower than 0.52 observed  
261 among the African buffalo (*Syncerus caffer*) breeds by Smitz, Berthouly (44), but  
262 higher than the  $F_{ST}$  estimates reported in previous studies [45-47]. These differences  
263 may be caused by the following: 1) small population effect sizes that may be resulted  
264 in data error, 2) differences in buffalo breeds or geographical distribution, and 3)  
265 differences in the estimated methods or markers density.

266 Analysis of the genome-wide LD decay plays a vital role in the GWAS mapping  
267 of loci associated with economically important traits in livestock animals. Our  
268 previous studies have demonstrated that the LD extent was different between purebred  
269 and crossbred buffalo populations, with purebred having highest levels of LD [5]. In  
270 this study, we estimated the LD extent between river and swamp groups, showing that  
271 the LD decay in swamp group had declined markedly compared with the river group.  
272 This result suggested that these buffaloes in swamp group had a higher genetic  
273 diversity. Of note, LD extent across populations is much shorter in Chinese swamp  
274 buffaloes than the river and crossbred buffaloes. The average distance over which LD  
275 decay dropped to the value of 0.2 was approximately 15 Kb for swamp and 50 Kb for  
276 river group, respectively. This finding was also supported by previous studies [5].  
277 Moreover, it is well known that the Chinese indigenous breeds underwent a longer  
278 time of domestication compared with the river breeds. The assumption was also  
279 supported by the results from ROH analysis. The buffaloes in swamp group had the

---

280 lower fraction of ROH in short tract (0-2 Mb), while the river breed exhibit a higher  
281 fraction of ROH in long tract (>16 Mb). Interestingly, evidence indicated that ROH  
282 could be used to assist with the interpretation of the inbreeding coefficient and give  
283 insights about populations history [48, 49]; the short and long ROH can respectively  
284 reflect the remote and recent inbreeding activity [50]. Apparently, our data showed  
285 that the extensive remote and recent inbreeding activity was found in the swamp and  
286 river group, respectively.

287 Understanding the signatures of selection detected within livestock breeds can  
288 contribute to the identification of genomic regions that are or have been targeted by  
289 selection [51]. Here, we performed the selective sweeps analysis between river and  
290 swamp groups using hapFLK analysis. A total of 12 genomic regions was identified  
291 with an average length of 4.24 Mb. In these regions, we found that a total of 12 top  
292 significantly SNPs detected within 9 chromosomes, corresponding to 8 candidate  
293 genes and 1 lncRNA (LOC112579725) fragment. Most of the candidate genes were  
294 predicted to be associated with cell structure and function. For example, *CHCHD3*, as  
295 the inner mitochondrial membrane scaffold protein, plays a role in cell growth and  
296 oxygen consumption [52]. *HYAL4* and its paralog gene *SPAMI* has demonstrated to  
297 be similar in structure to hyaluronidases that were one of the major  
298 glycosaminoglycans of the extracellular matrix involved in cell proliferation,  
299 migration, and differentiation [53-55]. *ACVR1C* is a type I receptor for the TGFB  
300 family of signaling molecules that plays a role in cell differentiation, growth arrest,  
301 and apoptosis [56]. Numerous studies have demonstrated that *DEPTOR* is the  
302 negative regulator of the mTORC1 and mTORC2 signaling pathways, which play a  
303 vital role in cell growth, metabolism, and disease [57, 58]. *TPPP* has confirmed to  
304 play a role in the polymerization of tubulin into microtubules that involved in the  
305 multiple biological functions such as the cell migration, cilia and flagella,  
306 development, and gene regulation [58-60].

---

307 QTL mapping is critical for the gene cloning, molecular-marker-assisted selection  
308 breeding, and trait improvement, which has been widely used for animal [61] and  
309 plant breeding [62]. To further identify the QTLs associated with milk production  
310 traits in buffaloes, we performed the haplotypes analysis using a 0.5-Mb window  
311 around the top significantly SNPs. To our acknowledgment, information on the  
312 identification of QTLs associated with milk production traits in buffalo is limited. Liu  
313 et al. [63] found that 2 genomic regions were found to associate with buffalo milk  
314 production traits. Here, we discovered a total of 18 blocks within 6 chromosomes.  
315 Among these blocks, 13 blocks were found to be significantly associated with the  
316 milk production traits in buffaloes. Interestingly, 4 blocks (11\_Block2, 12\_Block2,  
317 16\_Block1, and 19\_Block5) harbored the top significantly SNPs have also been  
318 significantly associated with milk production traits in buffaloes ( $P < 0.05$ ). Notably,  
319 the diplotype H2H2 in 12\_Block2, H1H3 in 11\_Block2, H2H2 in 16\_Block1, and  
320 H2H4 in 19\_Block5 can consider as the dominant haplotype combinations related to  
321 milk traits in buffaloes based on the Bonferroni analysis. For these QTL regions,  
322 moreover, we found that some candidate genes can be predicted in the 11\_Block2 and  
323 19\_Block5, while no candidate gene was discovered within the 12\_Block2 and  
324 16\_Block1 regions. For the 11\_Block2, the *FUT8* was found to be a signaling  
325 receptor involved in many physiological and pathological processes [64], implying  
326 that this QTL might be related to cell growth. In the 19\_Block5, the *SLC9A3*, *EXOC3*,  
327 *AHRR*, *CEP72*, *PRB1*, and *TPPP* genes were predicted. As the *AHRR* participated in  
328 the aryl hydrocarbon receptor (AhR) signaling cascade [65], *CEP72* [66] and *TPPP*  
329 [67] participated in the microtubule formation; the result suggested that these genes  
330 might be related to the cell growth and differentiation. Notably, Basham et al. [68]  
331 reported that *AHRR* could mediate the AHR signal pathway to block milk production  
332 in mammary epithelial cell and block transcription of the milk gene  $\beta$ -casein. *SLC9A3*  
333 was the member of solute carrier family that played a vital role in the signal  
334 transduction, and amino acid as well as glucose transporter [69]. Although limited

---

335 information on these genes associated with milk production traits has been reported,  
336 we have reason to assume that these candidate genes should have genetic effects on  
337 milk production traits based on their biological function. Further research of these  
338 candidate genes is warranted to explore the underlying molecular mechanism of the  
339 phenotypic traits in buffaloes.

## 340 **Materials and methods**

### 341 **Ethics Statement**

342 All animal work, experimental protocols, and animal care were approved by the  
343 Animal Ethics Committee of the Buffalo Research Institute (BRI), Chinese Academy  
344 of Agricultural Sciences (CAAS) (approval code GXBRI-06-2019).

### 345 **Sampling and Genotyping**

346 A total of 176 unrelated buffaloes representing 13 breeds were included in the present  
347 study (**Table 1**), and their geographical origin was shown in **Fig 6**. We collected a  
348 total of 102 blood samples, of which 23 river and 20 crossbred buffaloes were from  
349 BRI-CAAS, and 59 swamp buffaloes were collected from different villages in  
350 Southwest China. Moreover, we obtained publicly available genotypic data from 74  
351 buffaloes provided by Colli et al. [10].

352 Genomic DNA for each blood sample was isolated using the TIANamp Blood  
353 DNA Kit [Tiangen Biotech (Beijing) Co., Ltd., Beijing, China]. Quality and quantity  
354 of isolated DNA were detected using the NanoDrop2000 spectrophotometer (Thermo  
355 Fisher Scientific, Wilmington, DE, USA) and 1.5% Gel electrophoresis, respectively.  
356 SNP genotyping was performed using the Axiom<sup>®</sup> Buffalo Genotyping Array  
357 (Affymetrix, Santa Clara, CA, USA). For the quality control, SNPs with  $MAF \leq 0.05$ ,  
358 SNP call rate  $\leq 95\%$ , individual call rate  $\leq 95\%$  were excluded using the PLINK 1.9  
359 [70]. After filtering the duplicate and unknown chromosomal SNPs, a total of 35,547  
360 SNPs was used for subsequent analysis.

### 361 **Population genetics analysis**

---

362 To explore the individuals' relationship in the analyzed breeds, we determined the  
363 eigenvectors significance using EIGENSOFT 7.2 [71] software with the Tracey-  
364 Widom test and visualized the PCA plot with in-house R scripts. PHYLIP 3.697 [72]  
365 was conducted to calculate the distance matrix, and MEGA7 [73] was used to present  
366 the neighbor-joining tree. Population structure among the analyzed buffaloes was  
367 determined using the ADMIXTURE 1.3.0 [74] software with the cluster (K) number  
368 set from 2 to 4. Admixture plots were further visualized using the Microsoft Office  
369 Excel 2016.

### 370 **Genetic diversity**

371 Genome-wide genetic variability within buffalo breeds was measured by the Arlequin  
372 3.5.2 [75] software with the three metrics:  $H_O$ ,  $H_e$ , and  $A_R$ . Population differentiation  
373 for the pairwise genetic differentiation  $F_{ST}$  value was measured using the adegenet [76]  
374 R-package.

### 375 **Linkage disequilibrium decay**

376 Genome-wide LD was evaluated between river and swamp groups. To diminish the  
377 SNP ascertainment bias, we randomly selected the same sample numbers (n=43) for  
378 each group. For all pairs of SNPs, the pair-wise LD between river and swamp groups  
379 was calculated and visualized using the PopLDdecay [77].

### 380 **Identification of Runs of Homozygosity**

381 ROH between river and swamp groups was detected using the sliding-window based  
382 method implemented in detectRUNS [78] R-package with the following parameters:  
383 windowSize=15, threshold=0.05, minSNP=20, and minDensity=1/50000.  $F_{ROH}$  on the  
384 contrast model was calculated using the following equation:

$$385 \quad F_{ROH_j} = \frac{\sum_k length(ROH_k)}{L},$$

386 where  $ROH_k$  = the  $k$ th ROH in individual  $j$ 's genome and  $L$  = the total length of  
387 the genome (or X-chromosome).

### 388 **Identification of selection signatures**

389 Selection signature analysis on the contrast model was performed using the hapFLK  
390 1.4 [79] software. Briefly, we firstly performed LD pruning analysis and admixture  
391 analysis to obtain the population IDs for hapFLK analysis, which was respectively  
392 implemented in the PLINK1.9 and ADMIXTURE 1.3.0. The main parameters for LD  
393 pruning analysis were as follows: a window size of 50 SNPs, a step size of 5 bp and  
394 an  $r^2$  threshold of 0.5. In the hapFLK analysis, the number of clusters (-K) was set to  
395 2, and the expectation maximization iterations (--nfit) were specified to 20. The  
396 hapFLK values were adjusted using the following equation:

397 
$$hapFLK_{adj} = \frac{hapFLK - mean(hapFLK)}{sd(hapFLK)},$$

398 where the mean and sd values of hapFLK were calculated using the MASS R-  
399 package. The q-values of  $hapFLK_{adj}$  was computed using a chi-square distribution  
400 with in-house R scripts. A q-value threshold of 0.01 was applied to limit the number  
401 of false positives.

#### 402 **Haplotype and association analysis**

403 Phenotypic and genotypic data for 489 Italian Mediterranean buffaloes was provided  
404 by Liu et al. [63]. Phenotypic data for the peak milk yield (PM), total milk yield (MY),  
405 fat yield (FY), fat percentage (FP), protein yield (PY), and protein percentage (PP)  
406 was included during a 13-yr period (2002-2014). The identified genomic regions were  
407 surveyed to construct haplotype blocks within 0.5 Mb of the top significantly SNPs  
408 using HaploView 4.2 (Barrett et al., 2005). Association between each haplotype  
409 combination and 6 milk production traits were performed using the SAS 9.4 (SAS  
410 Institute Inc., Cary, NC) software with the following model:

411 
$$Y_{ijklm} = \mu + H_l + Y_i + S_k + P_j + B_m + e_{ijklm},$$

412 where  $Y_{ijklm}$  = the trait observation,  $\mu$  = the overall mean,  $H_l$  = the fixed effect of  
413 the  $l$ th herd (4 farms),  $Y_i$  = the fixed effect of the  $i$ th year,  $S_k$  = the fixed effect of the  
414  $k$ th season of calving (2 seasons),  $P_j$  = the fixed effect of the  $j$ th parity classes (1 to 7  
415 and  $\geq 8$ ),  $B_m$  = the fixed effect of the  $m$ th haplotype block, and  $e_{ijklm}$  = the random  
416 residual. Bonferroni t-test for pairwise comparisons among different levels of fixed



417 effects was used. The threshold of  $P$ -value  $< 0.05$  was used to identify the haplotype  
418 blocks affecting buffalo milk traits identified as the candidate QTLs.

### 419 **Gene Annotation**

420 We annotated the identified regions under significant selection pressure using the  
421 NCBI's Genome Data Viewer on the buffalo genome (*UOA\_WB\_I*). Genes within a  
422 region spanning 50 Kb upstream and downstream of the candidate selection regions  
423 were annotated. Moreover, the identification of candidate genes within the QTLs was  
424 also performed based on the current buffalo genome.

### 425 **Supporting information captions**

426 **S1 Fig. Distribution of autosomal ROH between river and swamp groups**

427 **S1 Table. Distribution of SNP number per chromosome, mean length (Mb), mean length  
428 of adjacent SNPs and average LD for the markers set after quality control**

429 **S2 Table. Estimates of the pairwise genetic differentiation statistic among breeds ( $F_{ST}$   
430 statistics; below the diagonal).**

431 **S1 Data Sheets. Genotype datasets of 176 buffaloes were used in this study.**

### 432 **Acknowledgments**

433 We thank the anonymous for the smallholders for their supports on the buffalo  
434 samples.

### 435 **Funding Statement**

436 Funded by the Major Science and Technology Projects in Guangxi (AA16450002),  
437 Central Guidance for Local Science and Technology Development Projects  
438 (ZY18164003), and Natural Science Foundation of Guangxi (2017GXNSFBA198191  
439 and 2017GXNSFBA198022). The funders had no role in study design, data collection  
440 and analysis, decision to publish, or preparation of the manuscript.

### 441 **Author Contributions**

442 **Conceptualization:** Ting-Xian Deng

443 **Formal analysis:** Ting-Xian Deng

444 **Funding Acquisition:** Ting-Xian Deng and Xian-Wei Liang

---

445 **Investigation:** Xing-Rong Lu, An-Qin Duan, Xiao-Ya Ma, Sha-Sha Liang

446 **Methodology:** Ting-Xian Deng, Xing-Rong Lu, and An-Qin Duan

447 **Resources:** Ting-Xian Deng and Xian-Wei Liang

448 **Writing-original draft:** Ting-Xian Deng

449 **Writing-review & editing:** Ting-Xian Deng and Xing-Rong Lu

450 **Data Availability**

451 The genotype datasets of this study are provided as the Supplementary Data Sheets S1.

452 **References**

- 453 1. Mishra B, Dubey P, Prakash B, Kathiravan P, Goyal S, Sadana D, et al. Genetic  
454 analysis of river, swamp and hybrid buffaloes of north-east India throw new light  
455 on phylogeography of water buffalo (*Bubalus bubalis*). *Journal of Animal*  
456 *Breeding and Genetics*. 2015;132(6):454-66.
- 457 2. Cui B, Wang F, Cui Y, Zhang Y, Li J, Hui T, et al. A bried analysis of the  
458 current status of the Chinese buffalo industry. *Meat research*. 2013;27:37-40.
- 459 3. Degrandi TM, Pita S, Panzera Y, Oliveira EHCD, Marques JRF, Figueiró MR, et  
460 al. Karyotypic evolution of ribosomal sites in buffalo subspecies and their  
461 crossbreed. *Genetics & Molecular Biology*. 2014;37(2):375-80.
- 462 4. Harisah M, Azmi T, Hilmi M, Vidyadaran M, Bongso T, Nava Z, et al.  
463 Identification of crossbred buffalo genotypes and their chromosome segregation  
464 patterns. *Genome*. 1989;32(6):999-1002.
- 465 5. Deng T, Liang A, Liu J, Hua G, Ye T, Liu S, et al. Genome-Wide SNP Data  
466 Revealed the Extent of Linkage Disequilibrium, Persistence of Phase and  
467 Effective Population Size in Purebred and Crossbred Buffalo Populations.  
468 *Frontiers in Genetics*. 2019;9:688.
- 469 6. Yindee M, Vlamings B, Wajjwalku W, Techakumphu M, Lohachit C,  
470 Sirivaidyapong S, et al. Y-chromosomal variation confirms independent  
471 domestications of swamp and river buffalo. *Animal genetics*. 2010;41(4):433-5.
- 472 7. Lei C, Zhang W, Chen H, Lu F, Liu R, Yang X, et al. Independent maternal  
473 origin of Chinese swamp buffalo (*Bubalus bubalis*). *Animal Genetics*.  
474 2007;38(2):97-102.
- 475 8. Kumar S, Nagarajan M, Sandhu JS, Kumar N, Behl V, Nishanth G.  
476 Mitochondrial DNA analyses of Indian water buffalo support a distinct genetic  
477 origin of river and swamp buffalo. *Animal genetics*. 2007;38(3):227-32. doi:  
478 10.1111/j.1365-2052.2007.01602.x. PubMed PMID: 17459014.
- 479 9. Zhang Y, Lu Y, Yindee M, Li KY, Kuo HY, Ju YT, et al. Strong and stable  
480 geographic differentiation of swamp buffalo maternal and paternal lineages  
481 indicates domestication in the China/Indochina border region. *Molecular*  
482 *ecology*. 2016;25(7):1530-50.

- 
- 483 10. Colli L, Milanesi M, Vajana E, Iamartino D, Bomba L, Puglisi F, et al. New  
484 insights on water buffalo genomic diversity and post-domestication migration  
485 routes from medium density SNP chip data. *Frontiers in genetics*. 2018;9:53.
- 486 11. Yue X-P, Li R, Xie W-M, Xu P, Chang T-C, Liu L, et al. Phylogeography and  
487 domestication of Chinese swamp buffalo. *PloS one*. 2013;8(2):e56552.
- 488 12. Wu FQ, Shen SK, Zhang XJ, Wang YH, Sun WB. Genetic diversity and  
489 population structure of an extremely endangered species: the world's largest  
490 *Rhododendron*. *AoB Plants*. 2015;7:plu082.
- 491 13. Bertolini F, Schiavo G, Scotti E, Ribani A, Martelli PL, Casadio R, et al. High-  
492 throughput SNP discovery in the rabbit (*Oryctolagus cuniculus*) genome by next-  
493 generation semiconductor-based sequencing. *Animal genetics*. 2014;45(2):304-7.  
494 doi: 10.1111/age.12121. PubMed PMID: 24444082.
- 495 14. Blanca J, Esteras C, Ziarsolo P, Perez D, Ferna Ndez-Pedrosa V, Collado C, et  
496 al. Transcriptome sequencing for SNP discovery across *Cucumis melo*. *BMC*  
497 *genomics*. 2012;13:280. doi: 10.1186/1471-2164-13-280. PubMed PMID:  
498 22726804; PubMed Central PMCID: PMC3473316.
- 499 15. CW W. SNP discovery in non-model organisms using 454 next generation  
500 sequencing. *Methods Mol Biol*. 2012;888(33-53).
- 501 16. Deng T, Pang C, Lu X, Zhu P, Duan A, Tan Z, et al. De Novo Transcriptome  
502 Assembly of the Chinese Swamp Buffalo by RNA Sequencing and SSR Marker  
503 Discovery. *PloS one*. 2016;11(1):e0147132. doi: 10.1371/journal.pone.0147132.  
504 PubMed PMID: 26766209; PubMed Central PMCID: PMC4713091.
- 505 17. Myakishev MV, Khripin Y, Hu S, Hamer DH. High-throughput SNP genotyping  
506 by allele-specific PCR with universal energy-transfer-labeled primers. *Genome*  
507 *research*. 2001;11(1):163-9. PubMed PMID: 11156625; PubMed Central  
508 PMCID: PMC311033.
- 509 18. Fan J-B, Chen X, Halushka MK, Berno A, Huang X, Ryder T, et al. Parallel  
510 genotyping of human SNPs using generic high-density oligonucleotide tag  
511 arrays. *Genome Research*. 2000;10(6):853-60.
- 512 19. Tossier-Klopp G, Bardou P, Bouchez O, Cabau C, Crooijmans R, Dong Y, et al.  
513 Design and characterization of a 52K SNP chip for goats. *PloS one*.  
514 2014;9(1):e86227. doi: 10.1371/journal.pone.0086227. PubMed PMID:  
515 24465974; PubMed Central PMCID: PMC3899236.
- 516 20. Porto-Neto LR, Sonstegard TS, Liu GE, Bickhart DM, Da Silva MV, Machado  
517 MA, et al. Genomic divergence of zebu and taurine cattle identified through  
518 high-density SNP genotyping. *BMC genomics*. 2013;14:876. doi: 10.1186/1471-  
519 2164-14-876. PubMed PMID: 24330634; PubMed Central PMCID:  
520 PMC4046821.
- 521 21. Manunza A, Zidi A, Yeghoyan S, Balteanu VA, Carsai TC, Scherbakov O, et al.  
522 A high throughput genotyping approach reveals distinctive autosomal genetic  
523 signatures for European and Near Eastern wild boar. *PloS one*.  
524 2013;8(2):e55891. doi: 10.1371/journal.pone.0055891. PubMed PMID:

- 
- 525 23460788; PubMed Central PMCID: PMC3584081.
- 526 22. Kujur A, Bajaj D, Upadhyaya HD, Das S, Ranjan R, Shree T, et al. A genome-  
527 wide SNP scan accelerates trait-regulatory genomic loci identification in  
528 chickpea. *Scientific reports*. 2015;5:11166. doi: 10.1038/srep11166. PubMed  
529 PMID: 26058368; PubMed Central PMCID: PMC4461920.
- 530 23. Iamartino D, Nicolazzi EL, Van CT, Reecy JM, Fritzwaters ER, Koltjes JE, et al.  
531 Design and validation of a 90K SNP genotyping assay for the water buffalo  
532 (*Bubalus bubalis*). *PloS one*. 2017;12(10):e0185220.
- 533 24. de Camargo GM, Aspilcueta-Borquis RR, Fortes MR, Porto-Neto R, Cardoso  
534 DF, Santos DJ, et al. Prospecting major genes in dairy buffaloes. *BMC*  
535 *Genomics*. 2015;16:872. doi: 10.1186/s12864-015-1986-2. PubMed PMID:  
536 26510479; PubMed Central PMCID: PMC4625573.
- 537 25. Liu JJ, Liang AX, Campanile G, Plastow G, Zhang C, Wang Z, et al. Genome-  
538 wide association studies to identify quantitative trait loci affecting milk  
539 production traits in water buffalo. *Journal of dairy science*. 2017.
- 540 26. El-Halawany N, Abdel-Shafy H, Shawky AEMA, Abdel-Latif MA, Al-Tohamy  
541 AFM, El-Moneim OMA, editors. *Genome-wide association study for milk*  
542 *production in Egyptian buffalo. The International Symposium on Animal*  
543 *Functional Genomics*; 2017.
- 544 27. Biswas S, Akey JM. Genomic insights into positive selection. *TRENDS in*  
545 *Genetics*. 2006;22(8):437-46.
- 546 28. Helyar SJ, Hemmer-Hansen J, Bekkevold D, Taylor M, Ogden R, Limborg M, et  
547 al. Application of SNPs for population genetics of nonmodel organisms: new  
548 opportunities and challenges. *Molecular ecology resources*. 2011;11:123-36.
- 549 29. Gouveia JJS, Silva MVGBd, Paiva SR, Oliveira SMPd. Identification of  
550 selection signatures in livestock species. *Genetics and molecular biology*.  
551 2014;37(2):330-42.
- 552 30. Qanbari S, Pimentel E, Tetens J, Thaller G, Lichtner P, Sharifi A, et al. A  
553 genome-wide scan for signatures of recent selection in Holstein cattle. *Animal*  
554 *genetics*. 2010;41(4):377-89.
- 555 31. Qanbari S, Gianola D, Hayes B, Schenkel F, Miller S, Moore S, et al.  
556 Application of site and haplotype-frequency based approaches for detecting  
557 selection signatures in cattle. *BMC Genomics*. 2011;12(1):318.
- 558 32. Barendse W, Harrison BE, Bunch RJ, Thomas MB, Turner LB. Genome wide  
559 signatures of positive selection: the comparison of independent samples and the  
560 identification of regions associated to traits. *BMC Genomics*. 2009;10(1):178.
- 561 33. Rubin C-J, Megens H-J, Barrio AM, Maqbool K, Sayyab S, Schwochow D, et al.  
562 Strong signatures of selection in the domestic pig genome. *Proceedings of the*  
563 *National Academy of Sciences*. 2012;109(48):19529-36.
- 564 34. Kijas JW, Lenstra JA, Hayes B, Boitard S, Neto LRP, San Cristobal M, et al.  
565 Genome-wide analysis of the world's sheep breeds reveals high levels of historic  
566 mixture and strong recent selection. *PLoS Biology*. 2012;10(2):e1001258.

- 
- 567 35. Mokhber M, Moradi-Shahrbabak M, Sadeghi M, Moradi-Shahrbabak H, Stella  
568 A, Nicolzzi E, et al. A genome-wide scan for signatures of selection in Azeri and  
569 Khuzestani buffalo breeds. *BMC Genomics*. 2018;19(1):449.
- 570 36. Fariello MI, Boitard S, Naya H, SanCristobal M, Servin B. Detecting signatures  
571 of selection through haplotype differentiation among hierarchically structured  
572 populations. *Genetics*. 2013;193(3):929-41.
- 573 37. Walugembe M, Bertolini F, Dematawewa CMB, Reis MP, Elbeltagy AR,  
574 Schmidt CJ, et al. Detection of selection signatures among Brazilian, Sri Lankan,  
575 and Egyptian chicken populations under different environmental conditions.  
576 *Frontiers in Genetics*. 2018;9:737.
- 577 38. Zhang Y SD, Yu Y, Zhang Y. Genetic variation and divergence among swamp  
578 buffalo, river buffalo and cattle: a microsatellite survey on five populations in  
579 China. *Asian Austral J Anim Sci*. 2008;21:1238-43.
- 580 39. Barker JS, Moore SS, Hetzel DJ, Evans D, Tan SG, Byrne K. Genetic diversity  
581 of Asian water buffalo (*Bubalus bubalis*): microsatellite variation and a  
582 comparison with protein-coding loci. *Animal genetics*. 1997;28(2):103-15.  
583 PubMed PMID: 9172308.
- 584 40. Zhang Y, Sun D, Yu Y, Zhang Y. Genetic diversity and differentiation of  
585 Chinese domestic buffalo based on 30 microsatellite markers. *Animal genetics*.  
586 2007;38(6):569-75. doi: 10.1111/j.1365-2052.2007.01648.x. PubMed PMID:  
587 17980000.
- 588 41. Zhang Y, Lu Y, Yindee M, Li KY, Kuo HY, Ju YT, et al. Strong and stable  
589 geographic differentiation of swamp buffalo maternal and paternal lineages  
590 indicates domestication in the China/Indochina border region. *Molecular  
591 ecology*. 2016;25(7):1530-50. doi: 10.1111/mec.13518. PubMed PMID:  
592 26677084.
- 593 42. Kathiravan P, Kataria R, Mishra B, Dubey P, Sadana D, Joshi B. Population  
594 structure and phylogeography of Toda buffalo in Nilgiris throw light on possible  
595 origin of aboriginal Toda tribe of South India. *Journal of Animal Breeding and  
596 Genetics*. 2011;128(4):295-304.
- 597 43. Iamartino D, Nicolazzi EL, Van Tassell CP, Reecy JM, Fritz-Waters ER, Koltse  
598 JE, et al. Design and validation of a 90K SNP genotyping assay for the water  
599 buffalo (*Bubalus bubalis*). *PLoS One*. 2017;12(10):e0185220. doi:  
600 10.1371/journal.pone.0185220. PubMed Central PMCID: PMC5628821.
- 601 44. Smits N, Berthouly C, Cornelis D, Heller R, Van Hooft P, Chardonnet P, et al.  
602 Pan-African genetic structure in the African buffalo (*Syncerus caffer*):  
603 investigating intraspecific divergence. *PloS one*. 2013;8(2):e56235. doi:  
604 10.1371/journal.pone.0056235. PubMed PMID: 23437100; PubMed Central  
605 PMCID: PMC3578844.
- 606 45. Zhang Y, Vankan D, Zhang Y, Barker JS. Genetic differentiation of water  
607 buffalo (*Bubalus bubalis*) populations in China, Nepal and south-east Asia:  
608 inferences on the region of domestication of the swamp buffalo. *Animal genetics*.



- 
- 609 2011;42(4):366-77. doi: 10.1111/j.1365-2052.2010.02166.x. PubMed PMID:  
610 21749419.
- 611 46. Vijh RK, Tantia MS, Mishra B, Bharani Kumar ST. Genetic relationship and  
612 diversity analysis of Indian water buffalo (*Bubalus bubalis*). *Journal of animal*  
613 *science*. 2008;86(7):1495-502. doi: 10.2527/jas.2007-0321. PubMed PMID:  
614 18344309.
- 615 47. Mishra B, Dubey P, Prakash B, Kathiravan P, Goyal S, Sadana D, et al. Genetic  
616 analysis of river, swamp and hybrid buffaloes of north-east India throw new light  
617 on phylogeography of water buffalo (*Bubalus bubalis*). *Journal of Animal*  
618 *Breeding and Genetics*. 2015;132(6):454-66.
- 619 48. Purfield DC, Berry DP, Sinead MP, Bradley DG. Runs of homozygosity and  
620 population history in cattle. *BMC genetics*. 2012;13(1):1-11.
- 621 49. Bjelland DW, Weigel KA, Vukasinovic N, Nkrumah JD. Evaluation of  
622 inbreeding depression in Holstein cattle using whole-genome SNP markers and  
623 alternative measures of genomic inbreeding. *Journal of dairy science*.  
624 2013;96(7):4697-706.
- 625 50. Ferencaković M, Sölkner J, Curik I. Estimating autozygosity from high-  
626 throughput information: effects of SNP density and genotyping errors. *Genetics*  
627 *Selection Evolution*. 2013;45(1):42. PubMed Central PMCID: PMC4176748.
- 628 51. Makina SO, Muchadeyi FC, van Marle-Koster E, Taylor JF, Makgahlela ML,  
629 Maiwashe A. Genome-wide scan for selection signatures in six cattle breeds in  
630 South Africa. *Genetics, selection, evolution : GSE*. 2015;47:92. doi:  
631 10.1186/s12711-015-0173-x. PubMed PMID: 26612660; PubMed Central  
632 PMCID: PMC4662009.
- 633 52. Darshi M, Mendiola VL, Mackey MR, Murphy AN, Koller A, Perkins GA, et al.  
634 *ChChd3*, an inner mitochondrial membrane protein, is essential for maintaining  
635 crista integrity and mitochondrial function. *Journal of Biological Chemistry*.  
636 2011;286(4):2918-32.
- 637 53. Atmuri V, Martin DC, Hemming R, Gutsol A, Byers S, Sahebjam S, et al.  
638 Hyaluronidase 3 (*HYAL3*) knockout mice do not display evidence of hyaluronan  
639 accumulation. *Matrix Biology*. 2008;27(8):653-60.
- 640 54. Badylak SF, Freytes DO, Gilbert TW. Extracellular matrix as a biological  
641 scaffold material: structure and function. *Acta biomaterialia*. 2009;5(1):1-13.
- 642 55. Theocharis AD, Skandalis SS, Gialeli C, Karamanos NK. Extracellular matrix  
643 structure. *Advanced Drug Delivery Reviews*. 2016;97:4-27.
- 644 56. Asnaghi L, White DT, Key N, Choi J, Mahale A, Alkatan H, et al.  
645 *ACVR1C/SMAD2* signaling promotes invasion and growth in retinoblastoma.  
646 *Oncogene*. 2019;38(12):2056-75.
- 647 57. Saxton RA, Sabatini DM. mTOR signaling in growth, metabolism, and disease.  
648 *Cell*. 2017;169(2):361-71.
- 649 58. Hu Y, Su H, Liu C, Wang Z, Huang L, Wang Q, et al. DEPTOR is a direct  
650 NOTCH1 target that promotes cell proliferation and survival in T-cell leukemia.

- 
- 651 Oncogene. 2017;36(8):1038-47.
- 652 59. Tökési N, Lehotzky A, Horváth I, Szabó B, Oláh J, Lau P, et al. TPPP/p25  
653 promotes tubulin acetylation by inhibiting histone deacetylase 6. *Journal of*  
654 *Biological Chemistry*. 2010;285(23):17896-906.
- 655 60. Zhou W, Wang X, Li L, Feng X, Yang Z, Zhang W, et al. Depletion of tubulin  
656 polymerization promoting protein family member 3 suppresses HeLa cell  
657 proliferation. *Molecular Cellular Biochemistry*. 2010;333(1-2):91-8.
- 658 61. Nishimura S, Watanabe T, Mizoshita K, Tatsuda K, Fujita T, Watanabe N, et al.  
659 Genome-wide association study identified three major QTL for carcass weight  
660 including the PLAG1-CHCHD7 QTN for stature in Japanese Black cattle. *BMC*  
661 *Genetics*. 2012;13(1):40.
- 662 62. Li Y, Yang K, Yang W, Chu L, Chen C, Zhao B, et al. Identification of QTL and  
663 Qualitative Trait Loci for Agronomic Traits Using SNP Markers in the Adzuki  
664 Bean. *Frontiers in Plant Science*. 2017;8:840.
- 665 63. Liu J, Liang A, Campanile G, Plastow G, Zhang C, Wang Z, et al. Genome-wide  
666 association studies to identify quantitative trait loci affecting milk production  
667 traits in water buffalo. *Journal of Dairy Science*. 2018;101(1):433-44.
- 668 64. Tu C-F, Wu M-Y, Lin Y-C, Kannagi R, Yang R-B. FUT8 promotes breast  
669 cancer cell invasiveness by remodeling TGF- $\beta$  receptor core fucosylation. *Breast*  
670 *Cancer Research*. 2017;19(1):111.
- 671 65. Fujii-Kuriyama Y, Kawajiri K. Molecular mechanisms of the physiological  
672 functions of the aryl hydrocarbon (dioxin) receptor, a multifunctional regulator  
673 that senses and responds to environmental stimuli. *Proc Jpn Acad Ser B Phys*  
674 *Biol Sci*. 2010;86(1):40-53.
- 675 66. Oshimori N, Li X, Ohsugi M, Yamamoto T. Cep72 regulates the localization of  
676 key centrosomal proteins and proper bipolar spindle formation. *EMBO Journal*.  
677 2009;28(14):2066-76.
- 678 67. Vincze O, Tökési N, Oláh J, Hlavanda E, Zotter Á, Horváth I, et al. Tubulin  
679 polymerization promoting proteins (TPPPs): members of a new family with  
680 distinct structures and functions. *Biochemistry*. 2006;45(46):13818-26.
- 681 68. Basham KJ, Leonard CJ, Kieffer C, Shelton DN, McDowell ME, Bhonde VR, et  
682 al. Dioxin exposure blocks lactation through a direct effect on mammary  
683 epithelial cells mediated by the aryl hydrocarbon receptor repressor.  
684 *Toxicological Sciences*. 2014;143(1):36-45.
- 685 69. Bionaz M, Loor JJ. Gene networks driving bovine mammary protein synthesis  
686 during the lactation cycle. *Bioinformatics and biology insights*. 2011;5:BBI.  
687 S7003.
- 688 70. Chang CC, Chow CC, Tellier LC, Vattikuti S, Purcell SM, Lee JJ. Second-  
689 generation PLINK: rising to the challenge of larger and richer datasets.  
690 *GigaScience*. 2015;4:7. doi: 10.1186/s13742-015-0047-8. PubMed PMID:  
691 25722852; PubMed Central PMCID: PMC4342193.
- 692 71. Patterson N, Price AL, Reich D. Patterson N, Price AL, Reich D. Population



- 
- 693 structure and eigenanalysis. *PLoS Genet* 2: 2074-2093. *Plos Genetics*.  
694 2007;2(12):e190.
- 695 72. Cummings MP. *PHYLIP (Phylogeny Inference Package)*: John Wiley & Sons,  
696 Inc.; 2004. 164-6 p.
- 697 73. Tamura K, Stecher G, Peterson D, Filipski A, Kumar S. *MEGA6: Molecular*  
698 *Evolutionary Genetics Analysis version 6.0*. *Molecular biology and evolution*.  
699 2013;30(12):2725-9. Epub 2013/10/18. doi: 10.1093/molbev/mst197. PubMed  
700 PMID: 24132122; PubMed Central PMCID: PMC3840312.
- 701 74. Alexander DH, Novembre J, Lange K. Fast model-based estimation of ancestry  
702 in unrelated individuals. *Genome research*. 2009;19(9):1655-64.
- 703 75. Excoffier L, Lischer HE. *Arlequin suite ver 3.5: a new series of programs to*  
704 *perform population genetics analyses under Linux and Windows*. *Molecular*  
705 *ecology resources*. 2010;10(3):564-7. doi: 10.1111/j.1755-0998.2010.02847.x.  
706 PubMed PMID: 21565059.
- 707 76. Jombart T. *adeigenet: a R package for the multivariate analysis of genetic*  
708 *markers*. *Bioinformatics*. 2008;24(11):1403-5. doi:  
709 10.1093/bioinformatics/btn129. PubMed PMID: 18397895.
- 710 77. Zhang C, Dong S-S, Xu J-Y, He W-M, Yang T-L. *PopLDdecay: a fast and*  
711 *effective tool for linkage disequilibrium decay analysis based on variant call*  
712 *format files*. *Bioinformatics*. 2018;35(10):1786-8.
- 713 78. Biscarini F, Cozzi P, Gaspa G, Marras G. *detectRUNS: Detect Runs of*  
714 *Homozygosity and Runs of Heterozygosity in Diploid Genomes*. 2018.
- 715 79. Fariello MI, Boitard S, Naya H, Sancristobal M, Servin B. Detecting signatures  
716 of selection through haplotype differentiation among hierarchically structured  
717 populations. *Genetics*. 2013;193(3):929-U448.
- 718 80. Coreteam R. *R: A language and environment for statistical computing*.  
719 *Computing*. 2018;1:12-21.

720

721

722

723

724

725

726

727

728

729

730

731

732

733

734

735 **Tables**

736 **Table 1. Genetic diversities for the analyzed buffalo populations in the South China region.** N,  
737 Sample size after QC; No. of usable loci, number of loci with <5% of missing data; No. of polym. loci,  
738 number of loci that resulted polymorphic in a breed; Ho, observed heterozygosity He, expected  
739 heterozygosity; A<sub>R</sub>, allelic richness.

| Group   | Breed     | Code | N     | No. of usable loci | No. of polym. loci | Ho(±SD)    | He(±SD)    | A <sub>R</sub> |
|---------|-----------|------|-------|--------------------|--------------------|------------|------------|----------------|
| River   |           |      | 43    | 35191              | 18081              | 0.429±0.11 | 0.436±0.08 | 1.994          |
|         | Murrah    | MUR  | 12    | 33250              | 16866              | 0.446±0.17 | 0.427±0.11 | 1.987          |
|         | Nili-Ravi | NIR  | 11    | 34105              | 17008              | 0.414±0.18 | 0.401±0.12 | 1.969          |
| Swamp   | Crossbred | CRO  | 20    | 34165              | 17573              | 0.438±0.14 | 0.433±0.09 | 1.999          |
|         |           |      | 133   | 35544              | 13505              | 0.167±0.18 | 0.174±0.19 | 1.740          |
|         | Hunan     | HUN  | 15    | 35097              | 8073               | 0.284±0.19 | 0.284±0.17 | 1.452          |
|         | Ensi      | ENS  | 15    | 34978              | 6532               | 0.321±0.18 | 0.328±0.15 | 1.366          |
|         | Fuling    | FUL  | 15    | 35122              | 6483               | 0.323±0.18 | 0.330±0.15 | 1.361          |
|         | Yibin     | YIB  | 15    | 34963              | 6427               | 0.322±0.18 | 0.327±0.15 | 1.363          |
|         | Yangzhou  | YAN  | 14    | 31871              | 6622               | 0.311±0.19 | 0.306±0.16 | 1.426          |
|         | Dechang   | DEC  | 12    | 34611              | 10084              | 0.250±0.19 | 0.250±0.17 | 1.566          |
|         | Dehong    | DEH  | 12    | 34622              | 7688               | 0.309±0.18 | 0.315±0.16 | 1.438          |
|         | Fuzhong   | FUZ  | 12    | 33829              | 6401               | 0.329±0.18 | 0.332±0.15 | 1.376          |
|         | Xilin     | XIL  | 11    | 34590              | 6227               | 0.335±0.18 | 0.345±0.15 | 1.354          |
| Guizhou | GUI       | 12   | 34665 | 6468               | 0.316±0.18         | 0.334±0.15 | 1.369      |                |

740

741

742

743

744

745 **Table 2. Summary of the selective sweep regions detected using hapFLK analyses between river**  
746 **and swamp groups.** CHR, chromosome.

| CHR   | Start (kb) | End (kb)  | Genomic region (Mb) | Number of candidate genes | Top significant SNP | Genes mapping top SNPs |
|-------|------------|-----------|---------------------|---------------------------|---------------------|------------------------|
| 1     | 197939132  | 201746066 | 3.81                | 15                        | AX-85111638         | KCNH8                  |
| 2     | 84613461   | 91314070  | 6.70                | 41                        | AX-85092726         | ACVR1C                 |
| 8     | 80317117   | 88124162  | 7.81                | 31                        | AX-85062676         | HYAL4,SPAM1            |
| 8     | 96080274   | 98588633  | 2.51                | 14                        | AX-85063572         | CHCHD3                 |
| 11    | 25584886   | 27617098  | 2.03                | 32                        | AX-85056732         | -                      |
| 12    | 15979826   | 16215148  | 0.24                | 3                         | AX-85129983         | -                      |
| 15    | 7435513    | 13248436  | 5.81                | 35                        | AX-85085538         | DEPTOR                 |
| 16    | 64367119   | 69995014  | 5.63                | 27                        | AX-85069732         | LOC112579725           |
| 16    | 70024989   | 79994535  | 9.97                | 25                        | AX-85130034         | LOC112579725           |
| 16    | 80043731   | 83241865  | 3.20                | 9                         | AX-85085883         | -                      |
| 19    | 69537494   | 71631407  | 2.09                | 31                        | AX-85108518         | TPPP                   |
| 24    | 12608124   | 13746779  | 1.14                | 3                         | AX-85085586         | CALN1                  |
| Total |            |           | 4.24                |                           |                     |                        |

747

748 **Table 3. Haplotype association analyses for the milk production traits in buffaloes**

| Chr_block <sup>1</sup> | Haplotype<br>(Abbreviations) | Frequency(±SD) | Traits <sup>2</sup> |          |         |          |         |          |
|------------------------|------------------------------|----------------|---------------------|----------|---------|----------|---------|----------|
|                        |                              |                | PM                  | MY       | PP      | PY       | FP      | FY       |
| 8_Block2               | CC(H1)                       | 0.715±0.0006   | 0.438               | 0.152    | 0.029*  | 0.207    | 0.029*  | 0.207    |
|                        | TA(H2)                       | 0.251±0.0007   |                     |          |         |          |         |          |
| 8_Block3               | GTGC(H1)                     | 0.446±0.0006   | 0.002**             | 0.006**  | 0.403   | 0.016*   | 0.403   | 0.016*   |
|                        | CATT(H2)                     | 0.369±0.0002   |                     |          |         |          |         |          |
|                        | CTTC(H3)                     | 0.150±0.0005   |                     |          |         |          |         |          |
| 11_Block2              | ATTTTCGT(H1)                 | 0.396±0.0009   | 0.000***            | 0.000*** | 0.037*  | 0.000*** | 0.037*  | 0.000*** |
|                        | GCCCCAGT(H2)                 | 0.310±0.0004   |                     |          |         |          |         |          |
|                        | ATCTTCAC(H3)                 | 0.177±0.0007   |                     |          |         |          |         |          |
|                        | GTCTCAGT(H4)                 | 0.062±0.0003   |                     |          |         |          |         |          |
| 12_Block1              | ACCA(H1)                     | 0.604±0.0006   | 0.200               | 0.009**  | 0.230   | 0.013*   | 0.230   | 0.013*   |
|                        | CTGG(H2)                     | 0.208±0.0012   |                     |          |         |          |         |          |
|                        | ACGG(H3)                     | 0.114±0.0013   |                     |          |         |          |         |          |
|                        | CCGG(H4)                     | 0.061±0.0007   |                     |          |         |          |         |          |
| 12_Block2              | CC(H1)                       | 0.706±0.0005   | 0.792               | 0.137    | 0.001** | 0.108    | 0.001** | 0.108    |
|                        | TT(H2)                       | 0.216±0.0005   |                     |          |         |          |         |          |
|                        | TC(H3)                       | 0.076±0.0005   |                     |          |         |          |         |          |
| 12_Block4              | CA(H1)                       | 0.496±0.0013   | 0.012*              | 0.013*   | 0.628   | 0.111    | 0.628   | 0.111    |
|                        | AA(H2)                       | 0.326±0.0015   |                     |          |         |          |         |          |
|                        | AC(H3)                       | 0.178±0.0008   |                     |          |         |          |         |          |
| 16_Block1              | CCGG(H1)                     | 0.449±0.0004   | 0.000***            | 0.001**  | 0.931   | 0.002**  | 0.931   | 0.002**  |
|                        | CTAA(H2)                     | 0.362±0.0006   |                     |          |         |          |         |          |
|                        | CTGG(H3)                     | 0.129±0.0002   |                     |          |         |          |         |          |
|                        | TTAA(H4)                     | 0.054±0.0005   |                     |          |         |          |         |          |
| 19_Block1              | AGAGGCTA(H1)                 | 0.416±0.0004   | 0.164               | 0.039*   | 0.007** | 0.037*   | 0.007** | 0.037*   |
|                        | GACTCTCG(H2)                 | 0.260±0.0006   |                     |          |         |          |         |          |
|                        | AACACTTG(H3)                 | 0.218±0.0008   |                     |          |         |          |         |          |
| 19_Block2              | TA(H1)                       | 0.638±0.0005   | 0.447               | 0.227    | 0.098   | 0.039*   | 0.098   | 0.039*   |
|                        | CG(H2)                       | 0.351±0.0003   |                     |          |         |          |         |          |
| 19_Block3              | AG(H1)                       | 0.457±0.0010   | 0.001**             | 0.000*** | 0.029*  | 0.009**  | 0.029*  | 0.009**  |
|                        | GT(H2)                       | 0.367±0.0016   |                     |          |         |          |         |          |
|                        | GG(H3)                       | 0.176±0.0019   |                     |          |         |          |         |          |
| 19_Block4              | GA(H1)                       | 0.770±0.0004   | 0.009**             | 0.001**  | 0.039*  | 0.023*   | 0.039*  | 0.023*   |
|                        | AG(H2)                       | 0.193±0.0002   |                     |          |         |          |         |          |
| 19_Block5              | GGTGT(H1)                    | 0.408±0.0020   | 0.003**             | 0.000*** | 0.064   | 0.018*   | 0.064   | 0.018*   |
|                        | GGCGT(H2)                    | 0.216±0.0005   |                     |          |         |          |         |          |
|                        | GGTAG(H3)                    | 0.170±0.0021   |                     |          |         |          |         |          |
|                        | ATTAG(H4)                    | 0.137±0.0006   |                     |          |         |          |         |          |
| 24_Block1              | AAAAG(H1)                    | 0.447±0.0012   | 0.068               | 0.026*   | 0.276   | 0.048*   | 0.276   | 0.048*   |
|                        | GGGGT(H2)                    | 0.390±0.0007   |                     |          |         |          |         |          |
|                        | GAAAG(H3)                    | 0.147±0.0012   |                     |          |         |          |         |          |

749 <sup>1</sup>Chr\_block=the buffalo chromosome and haplotype blocks

750 <sup>2</sup>PM = peak milk yield; MY = 270-d total milk yield; FY = 270-d fat yield; FP = 270-d fat percentage;

751 PY = 270-d protein yield; PP = 270-d protein percentage.

752 \* $P < 0.05$ ; \*\* $P < 0.01$ ; \*\*\* $P < 0.001$ : significant association after Bonferroni multiple test.

753

754 **Table 4 Genetic effects of haplotype combinations among the four QTL regions on milk**  
 755 **production traits in buffaloes**

| Blocks    | Haplotype combination | Traits             |                       |                   |                   |                      |                      |
|-----------|-----------------------|--------------------|-----------------------|-------------------|-------------------|----------------------|----------------------|
|           |                       | PM( $\pm$ SD)      | MY( $\pm$ SD)         | FP( $\pm$ SD)     | PP( $\pm$ SD)     | FY( $\pm$ SD)        | PY( $\pm$ SD)        |
| 11_Block2 | H1H1                  | 15.53 $\pm$ 0.43ab | 2918.31 $\pm$ 87.94b  | 7.96 $\pm$ 0.14a  | 7.96 $\pm$ 0.14a  | 231.32 $\pm$ 7.75b   | 231.32 $\pm$ 7.75b   |
|           | H1H2                  | 15.28 $\pm$ 0.40ab | 2850.28 $\pm$ 84.76bc | 8.03 $\pm$ 0.14a  | 8.03 $\pm$ 0.14a  | 227.12 $\pm$ 7.48b   | 227.12 $\pm$ 7.48b   |
|           | H1H3                  | 16.45 $\pm$ 0.44a  | 3147.73 $\pm$ 92.30a  | 7.94 $\pm$ 0.15a  | 7.94 $\pm$ 0.15a  | 248.41 $\pm$ 8.14a   | 248.41 $\pm$ 8.14a   |
|           | H1H4                  | 16.28 $\pm$ 0.43a  | 3038.39 $\pm$ 91.12a  | 8.03 $\pm$ 0.15a  | 8.03 $\pm$ 0.15a  | 243.68 $\pm$ 8.03a   | 243.68 $\pm$ 8.03a   |
|           | H2H2                  | 15.70 $\pm$ 0.44a  | 2975.41 $\pm$ 92.62a  | 7.72 $\pm$ 0.15b  | 7.72 $\pm$ 0.15b  | 228.92 $\pm$ 8.17bc  | 228.92 $\pm$ 8.17bc  |
|           | H3H2                  | 16.31 $\pm$ 0.42a  | 3053.66 $\pm$ 88.38a  | 7.90 $\pm$ 0.14a  | 7.90 $\pm$ 0.14a  | 241.38 $\pm$ 7.78a   | 241.38 $\pm$ 7.78a   |
|           | H3H3                  | 15.24 $\pm$ 0.54ab | 3008.24 $\pm$ 114.43a | 8.09 $\pm$ 0.19a  | 8.09 $\pm$ 0.19a  | 242.34 $\pm$ 10.08a  | 242.34 $\pm$ 10.08a  |
|           | H3H4                  | 16.99 $\pm$ 0.65a  | 3174.30 $\pm$ 136.78a | 7.98 $\pm$ 0.22a  | 7.98 $\pm$ 0.22a  | 253.45 $\pm$ 12.04a  | 253.45 $\pm$ 12.04a  |
|           | H4H2                  | 15.87 $\pm$ 0.59a  | 3025.39 $\pm$ 124.84a | 8.14 $\pm$ 0.20a  | 8.14 $\pm$ 0.20a  | 244.27 $\pm$ 10.99a  | 244.27 $\pm$ 10.99a  |
|           | H4H4                  | 15.79 $\pm$ 0.86a  | 2914.81 $\pm$ 182.73a | 8.03 $\pm$ 0.30a  | 8.03 $\pm$ 0.30a  | 232.10 $\pm$ 16.09   | 232.10 $\pm$ 16.09a  |
| 12_Block2 | H1H1                  | 15.75 $\pm$ 0.39   | 2992.38 $\pm$ 83.00   | 7.91 $\pm$ 0.14ab | 7.91 $\pm$ 0.14ab | 235.53 $\pm$ 7.23    | 235.53 $\pm$ 7.23    |
|           | H2H1                  | 15.76 $\pm$ 0.39   | 2943.13 $\pm$ 83.01   | 8.04 $\pm$ 0.14a  | 8.04 $\pm$ 0.14a  | 236.14 $\pm$ 7.23    | 236.14 $\pm$ 7.23    |
|           | H2H2                  | 15.83 $\pm$ 0.50   | 2858.51 $\pm$ 105.84  | 8.31 $\pm$ 0.17a  | 8.31 $\pm$ 0.17a  | 237.00 $\pm$ 9.21    | 237.00 $\pm$ 9.21    |
|           | H2H3                  | 15.30 $\pm$ 0.51   | 2830.18 $\pm$ 107.76  | 7.96 $\pm$ 0.18a  | 7.96 $\pm$ 0.18a  | 222.73 $\pm$ 9.38    | 222.73 $\pm$ 9.38    |
|           | H3H1                  | 15.76 $\pm$ 0.43   | 2919.22 $\pm$ 91.28   | 7.79 $\pm$ 0.15ab | 7.79 $\pm$ 0.15ab | 226.92 $\pm$ 7.95    | 226.92 $\pm$ 7.95    |
|           | H3H3                  | 14.67 $\pm$ 1.04   | 2844.60 $\pm$ 218.48  | 7.53 $\pm$ 0.36a  | 7.53 $\pm$ 0.36a  | 211.77 $\pm$ 19.01   | 211.77 $\pm$ 19.01   |
| 16_Block1 | H1H1                  | 15.55 $\pm$ 0.39ab | 2944.88 $\pm$ 83.37a  | 7.97 $\pm$ 0.14   | 7.97 $\pm$ 0.14   | 233.73 $\pm$ 7.28a   | 233.73 $\pm$ 7.28a   |
|           | H1H2                  | 15.50 $\pm$ 0.41ab | 2889.12 $\pm$ 86.01ab | 7.97 $\pm$ 0.14   | 7.97 $\pm$ 0.14   | 229.57 $\pm$ 7.50ab  | 229.57 $\pm$ 7.50ab  |
|           | H1H3                  | 15.34 $\pm$ 0.42ab | 2846.89 $\pm$ 88.02ab | 7.94 $\pm$ 0.15   | 7.94 $\pm$ 0.15   | 225.29 $\pm$ 7.67ab  | 225.29 $\pm$ 7.67ab  |
|           | H1H4                  | 16.34 $\pm$ 0.46a  | 3083.19 $\pm$ 96.24a  | 7.94 $\pm$ 0.16   | 7.94 $\pm$ 0.16   | 242.76 $\pm$ 8.39a   | 242.79 $\pm$ 8.39a   |
|           | H2H2                  | 16.36 $\pm$ 0.42a  | 3044.85 $\pm$ 88.00a  | 7.96 $\pm$ 0.15   | 7.96 $\pm$ 0.15   | 242.96 $\pm$ 7.67a   | 242.96 $\pm$ 7.67a   |
|           | H2H4                  | 16.01 $\pm$ 0.52a  | 2840.34 $\pm$ 110.07a | 8.08 $\pm$ 0.18   | 8.08 $\pm$ 0.18   | 229.46 $\pm$ 9.65a   | 229.46 $\pm$ 9.65a   |
|           | H3H2                  | 15.59 $\pm$ 0.46a  | 2970.29 $\pm$ 96.50a  | 7.99 $\pm$ 0.16   | 7.99 $\pm$ 0.16   | 237.52 $\pm$ 8.41a   | 237.52 $\pm$ 8.41a   |
|           | H3H3                  | 15.30 $\pm$ 0.64a  | 2842.73 $\pm$ 136.18a | 7.81 $\pm$ 0.23   | 7.81 $\pm$ 0.23   | 219.17 $\pm$ 11.87a  | 219.17 $\pm$ 11.86a  |
|           | H3H4                  | 14.56 $\pm$ 0.91a  | 2754.95 $\pm$ 192.82a | 7.68 $\pm$ 0.32   | 7.68 $\pm$ 0.32   | 212.21 $\pm$ 16.80a  | 212.21 $\pm$ 16.80a  |
| 19_Block5 | H1H1                  | 15.57 $\pm$ 0.41ab | 2917.36 $\pm$ 85.48b  | 8.04 $\pm$ 0.14   | 8.04 $\pm$ 0.14   | 233.27 $\pm$ 7.57a   | 233.26 $\pm$ 7.57a   |
|           | H1H2                  | 15.84 $\pm$ 0.42a  | 2991.74 $\pm$ 86.46a  | 7.96 $\pm$ 0.15   | 7.96 $\pm$ 0.15   | 237.28 $\pm$ 7.64a   | 237.28 $\pm$ 7.64a   |
|           | H1H3                  | 15.68 $\pm$ 0.40ab | 2907.34 $\pm$ 83.41b  | 7.96 $\pm$ 0.14   | 7.96 $\pm$ 0.14   | 230.68 $\pm$ 7.37a   | 230.68 $\pm$ 7.38a   |
|           | H1H4                  | 15.47 $\pm$ 0.43ab | 2969.81 $\pm$ 89.94b  | 7.99 $\pm$ 0.15   | 7.99 $\pm$ 0.15   | 235.78 $\pm$ 7.95a   | 235.78 $\pm$ 7.95a   |
|           | H2H2                  | 15.81 $\pm$ 0.48a  | 2967.22 $\pm$ 99.91b  | 8.12 $\pm$ 0.17   | 8.12 $\pm$ 0.17   | 240.37 $\pm$ 8.83a   | 240.37 $\pm$ 8.83a   |
|           | H2H4                  | 16.55 $\pm$ 0.45a  | 3195.95 $\pm$ 93.87a  | 7.72 $\pm$ 0.16   | 7.72 $\pm$ 0.16   | 246.58 $\pm$ 8.30a   | 246.58 $\pm$ 8.30a   |
|           | H3H2                  | 15.68 $\pm$ 0.44a  | 2962.21 $\pm$ 91.49b  | 8.01 $\pm$ 0.15   | 8.01 $\pm$ 0.15   | 235.94 $\pm$ 8.08a   | 235.94 $\pm$ 8.08a   |
|           | H3H3                  | 15.87 $\pm$ 0.62a  | 2996.27 $\pm$ 128.29a | 7.95 $\pm$ 0.22   | 7.95 $\pm$ 0.22   | 237.81 $\pm$ 11.49a  | 237.81 $\pm$ 11.49a  |
|           | H3H4                  | 15.90 $\pm$ 0.53a  | 2893.09 $\pm$ 109.42b | 7.70 $\pm$ 0.18   | 7.70 $\pm$ 0.18   | 223.73 $\pm$ 9.66a   | 223.73 $\pm$ 9.66a   |
|           | H4H4                  | 13.80 $\pm$ 0.68ab | 2586.08 $\pm$ 141.34b | 8.10 $\pm$ 0.24   | 8.10 $\pm$ 0.24   | 205.68 $\pm$ 12.75ab | 205.68 $\pm$ 12.75ab |

756

757

758

759

760

761

762 **Table 5 Details of candidate genes within the two QTL regions**

| QTLs      | Candidate genes | Start    | End      | Description                              |
|-----------|-----------------|----------|----------|------------------------------------------|
| 11_Block2 | FUT8            | 25566483 | 25895305 | fucosyltransferase 8                     |
|           | LOC112587805    | 25933854 | 25944065 | lncRNA                                   |
| 19_Block5 | SLC9A3          | 71410763 | 71447023 | solute carrier family 9-member A3        |
|           | EXOC3           | 71453525 | 71480557 | exocyst complex component 3              |
|           | AHRR            | 71484472 | 71573487 | aryl-hydrocarbon receptor repressor      |
|           | CEP72           | 71293814 | 71330945 | centrosomal protein 72                   |
|           | PRB1            | 71274556 | 71281442 | basic proline-rich protein-like          |
|           | TPPP            | 71269083 | 71290606 | tubulin polymerization promoting protein |

763  
764  
765  
766  
767  
768  
769  
770  
771  
772  
773  
774  
775  
776  
777  
778  
779  
780  
781  
782  
783  
784  
785  
786  
787  
788  
789  
790  
791  
792  
793  
794  
795  
796

797 **Figures legend**

798 **Fig 1. Population analysis of 13 buffalo breeds in South China.** (A) PCA plots display the  
799 individuals' relationship of 176 buffaloes. (B) Neighbor-joining representation of the pairwise Nei's D  
800 genetic distances among populations. (C) Population structure of 176 buffaloes inferred by model-  
801 based clustering using ADMIXTURE.

802 **Fig 2. MAF Distribution for the river and swamp groups.**

803 **Fig 3. LD decay and autozygosity frequency distribution of ROH between river and swamp**  
804 **groups.**

805 **Fig 4. Whole-genome scan for selective sweeps using hapFLK statistic.** The blue line represents a  
806 significant threshold.

807 **Fig 5. Haplotype patterns for the significant SNP based on LD within detected regions.**

808 **Fig 6. Geographic origin of the analyzed buffalo breeds in South China region.** Note: The R  
809 software [80] with the maptools and ggplot2 packages were used to create the map and corresponded to  
810 the database was downloaded from the National Geomatics Center of China (<http://www.ngcc.cn/>).

Figure 1

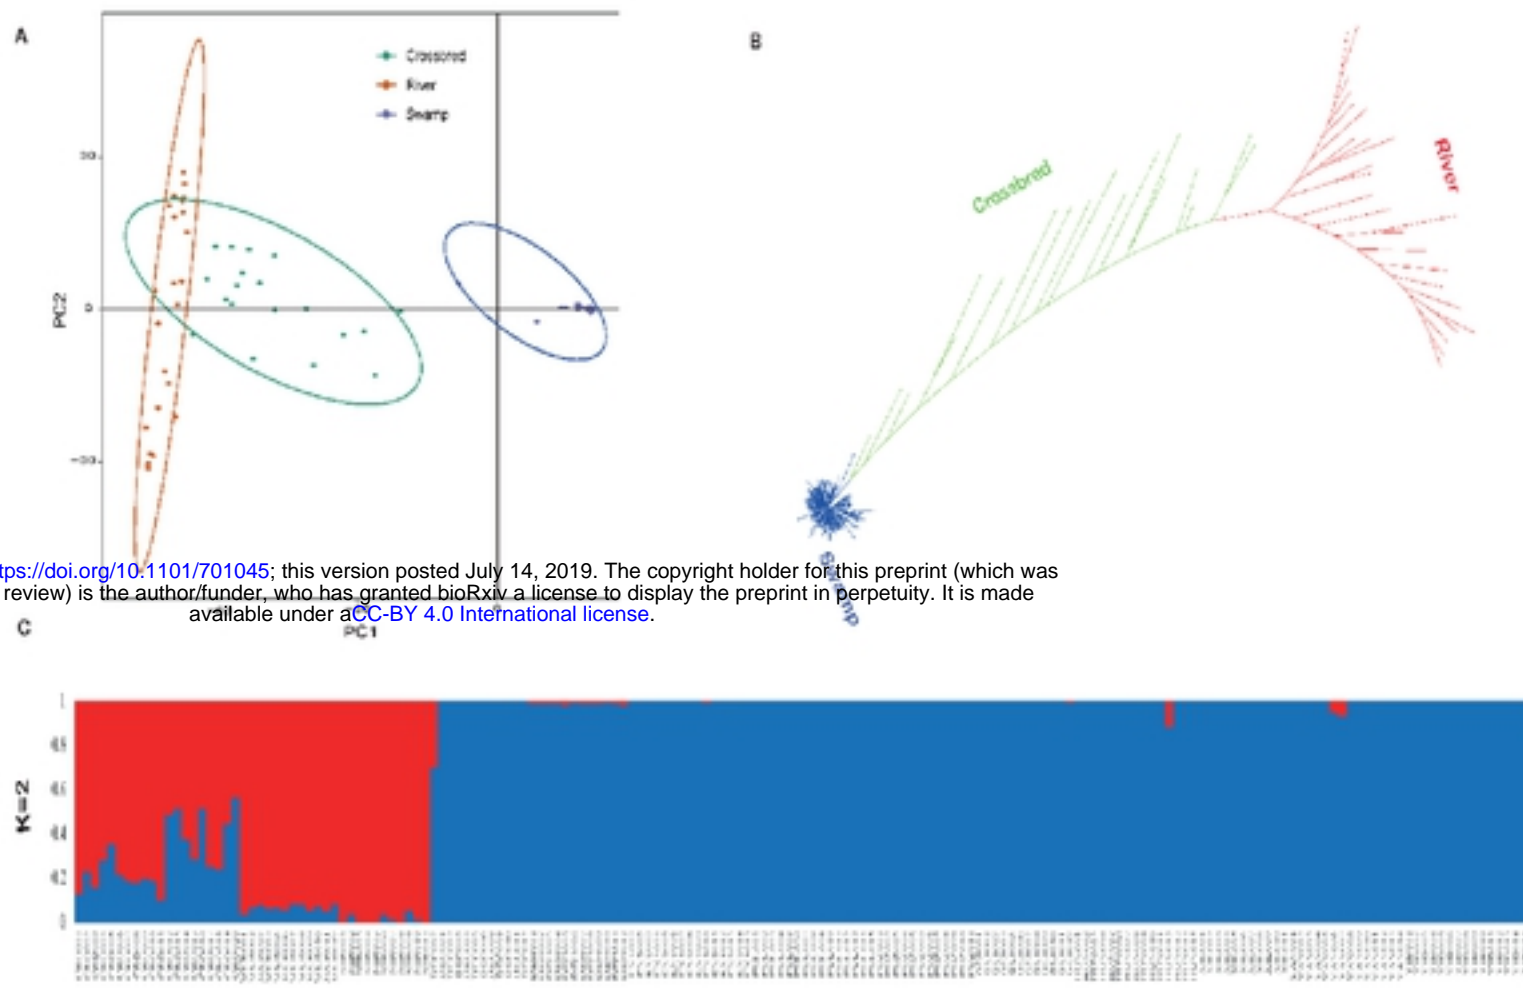

bioRxiv preprint doi: <https://doi.org/10.1101/701045>; this version posted July 14, 2019. The copyright holder for this preprint (which was not certified by peer review) is the author/funder, who has granted bioRxiv a license to display the preprint in perpetuity. It is made available under aCC-BY 4.0 International license.



bioRxiv preprint doi: <https://doi.org/10.1101/701045>; this version posted July 14, 2019. The copyright holder for this preprint (which was not certified by peer review) is the author/funder, who has granted bioRxiv a license to display the preprint in perpetuity. It is made available under aCC-BY 4.0 International license.

Figure 2

bioRxiv preprint doi: <https://doi.org/10.1101/701045>; this version posted July 14, 2019. The copyright holder for this preprint (which was not certified by peer review) is the author/funder, who has granted bioRxiv a license to display the preprint in perpetuity. It is made available under aCC-BY 4.0 International license.

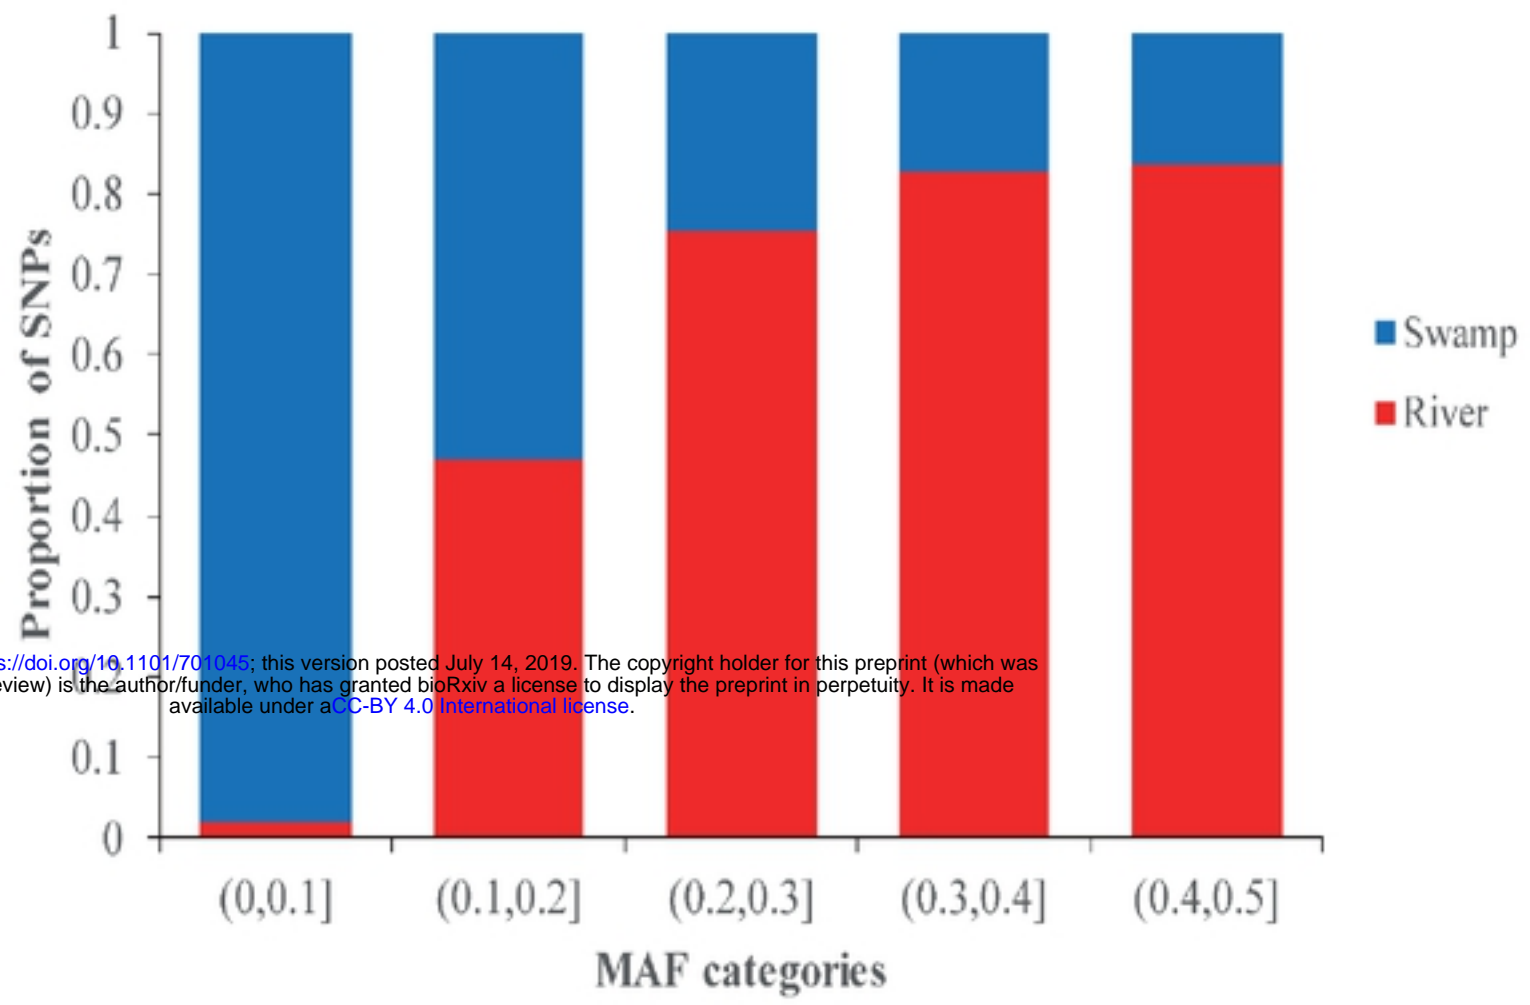

Figure 3

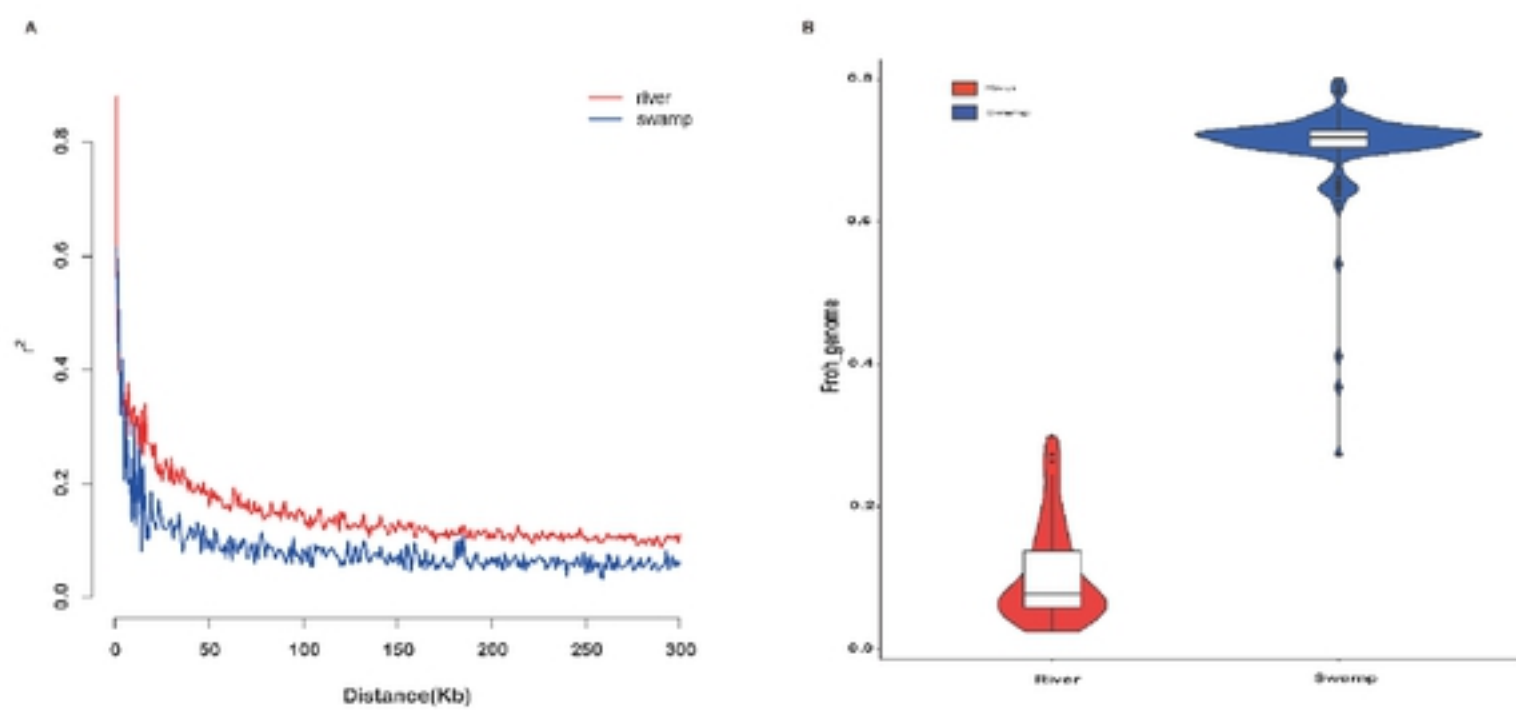

bioRxiv preprint doi: <https://doi.org/10.1101/701045>; this version posted July 14, 2019. The copyright holder for this preprint (which was not certified by peer review) is the author/funder, who has granted bioRxiv a license to display the preprint in perpetuity. It is made available under aCC-BY 4.0 International license.

Figure 4

bioRxiv preprint doi: <https://doi.org/10.1101/701045>; this version posted July 14, 2019. The copyright holder for this preprint (which was not certified by peer review) is the author/funder, who has granted bioRxiv a license to display the preprint in perpetuity. It is made available under aCC-BY 4.0 International license.

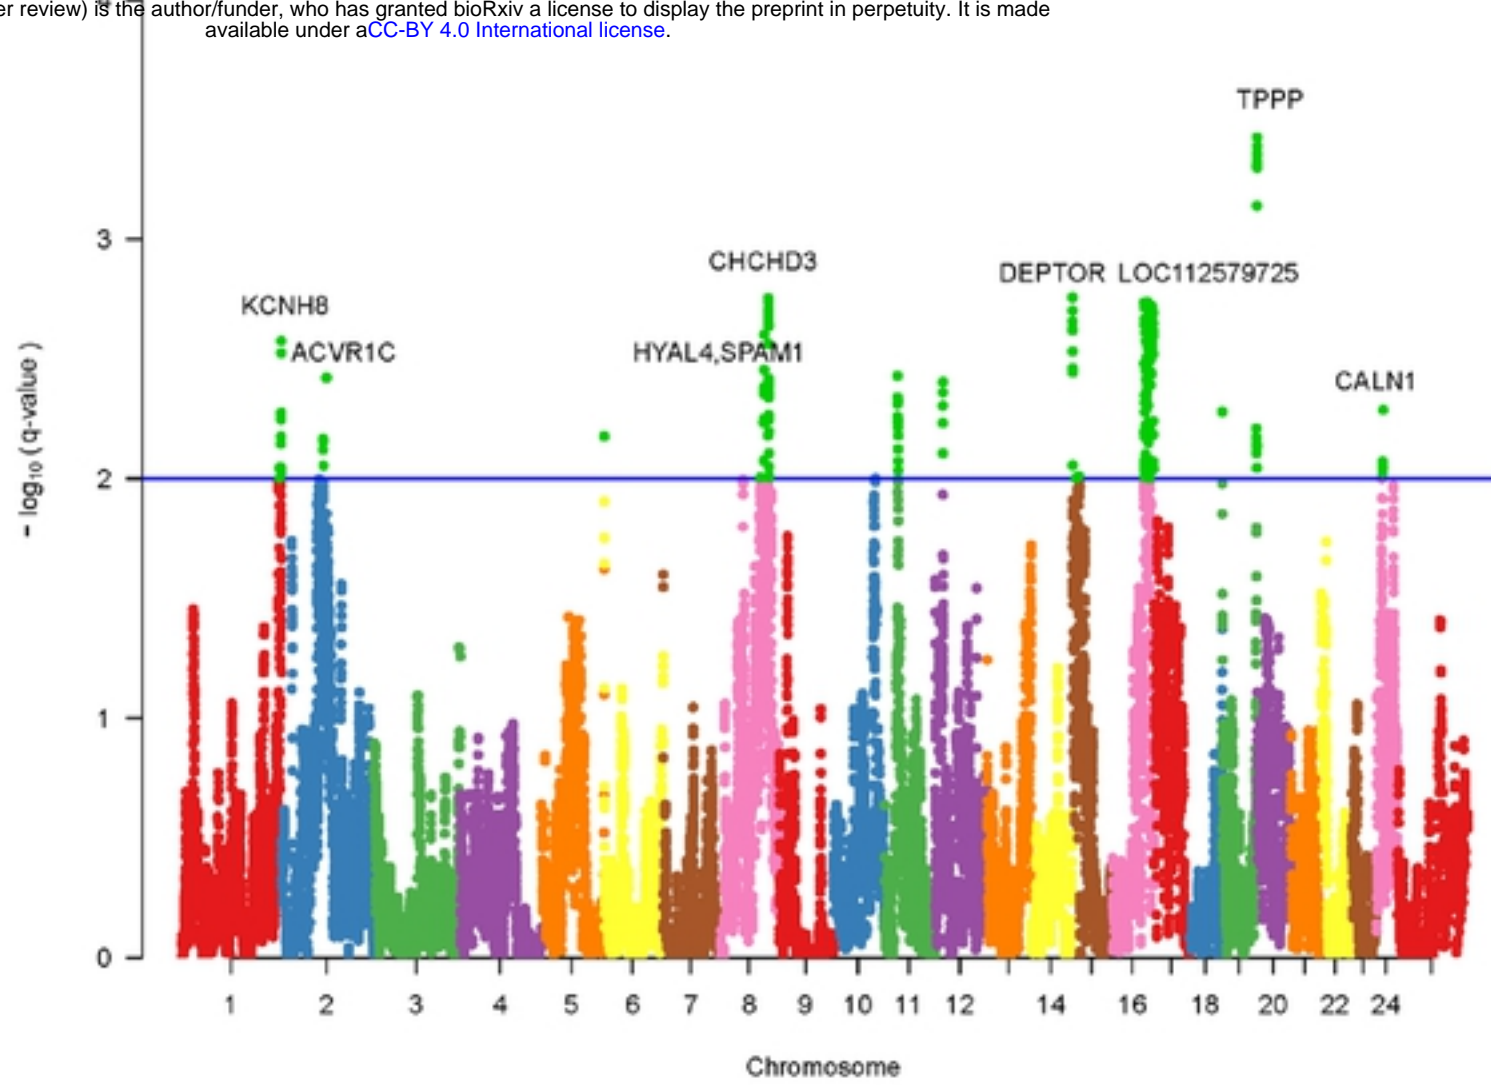

bioRxiv preprint doi: <https://doi.org/10.1101/701045>; this version posted July 14, 2019. The copyright holder for this preprint (which was not certified by peer review) is the author/funder, who has granted bioRxiv a license to display the preprint in perpetuity. It is made available under aCC-BY 4.0 International license.

**Figure 5**

**A Chr8**

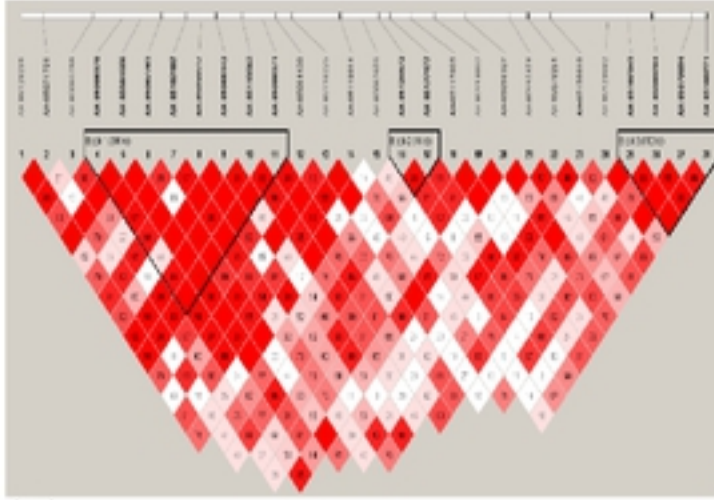

**B Chr11**

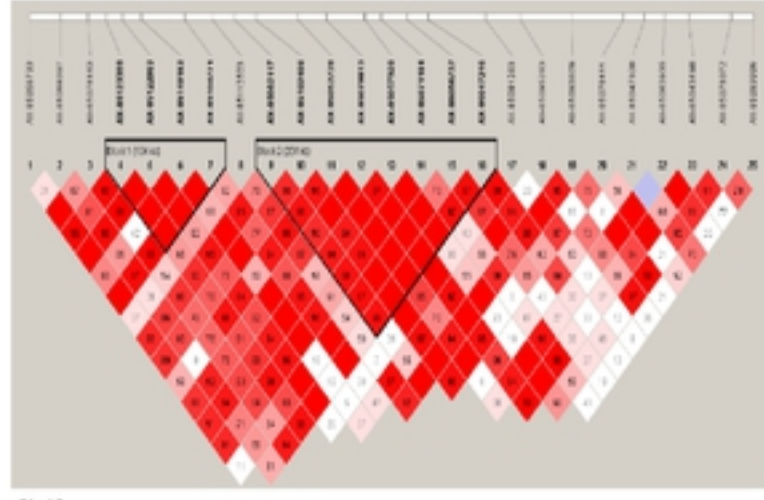

**C Chr12**

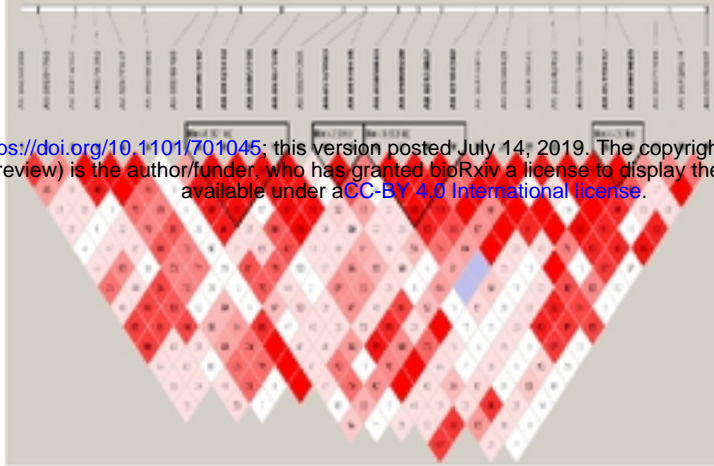

**D Chr16**

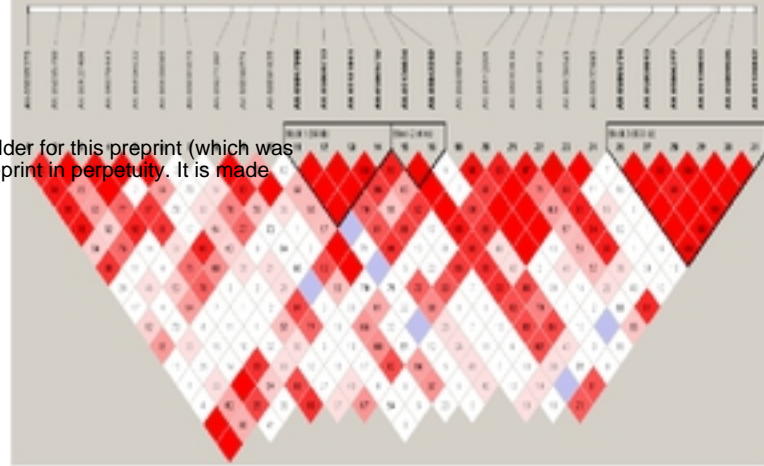

bioRxiv preprint doi: <https://doi.org/10.1101/701045>; this version posted July 14, 2019. The copyright holder for this preprint (which was not certified by peer review) is the author/funder, who has granted bioRxiv a license to display the preprint in perpetuity. It is made available under aCC-BY 4.0 International license.

**E Chr19**

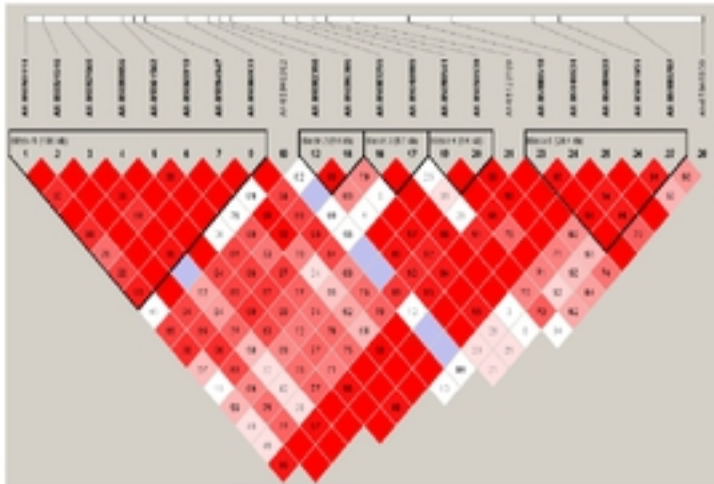

**F Chr24**

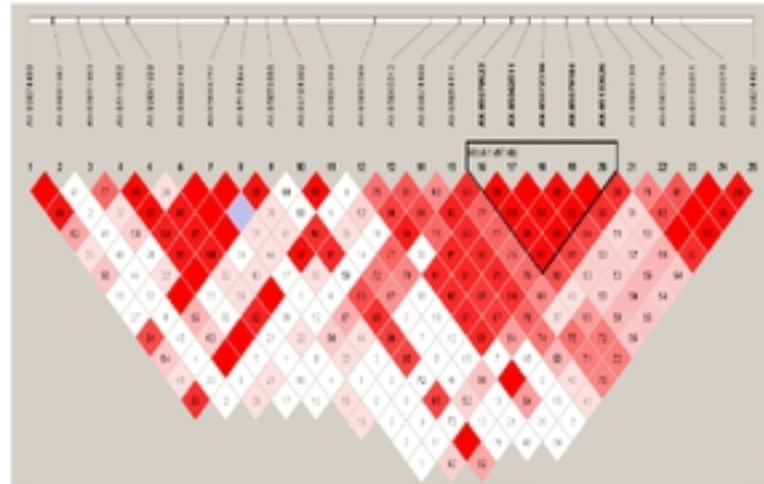



Figure 6

**Geographic origin of the analyzed buffalo breeds in China**

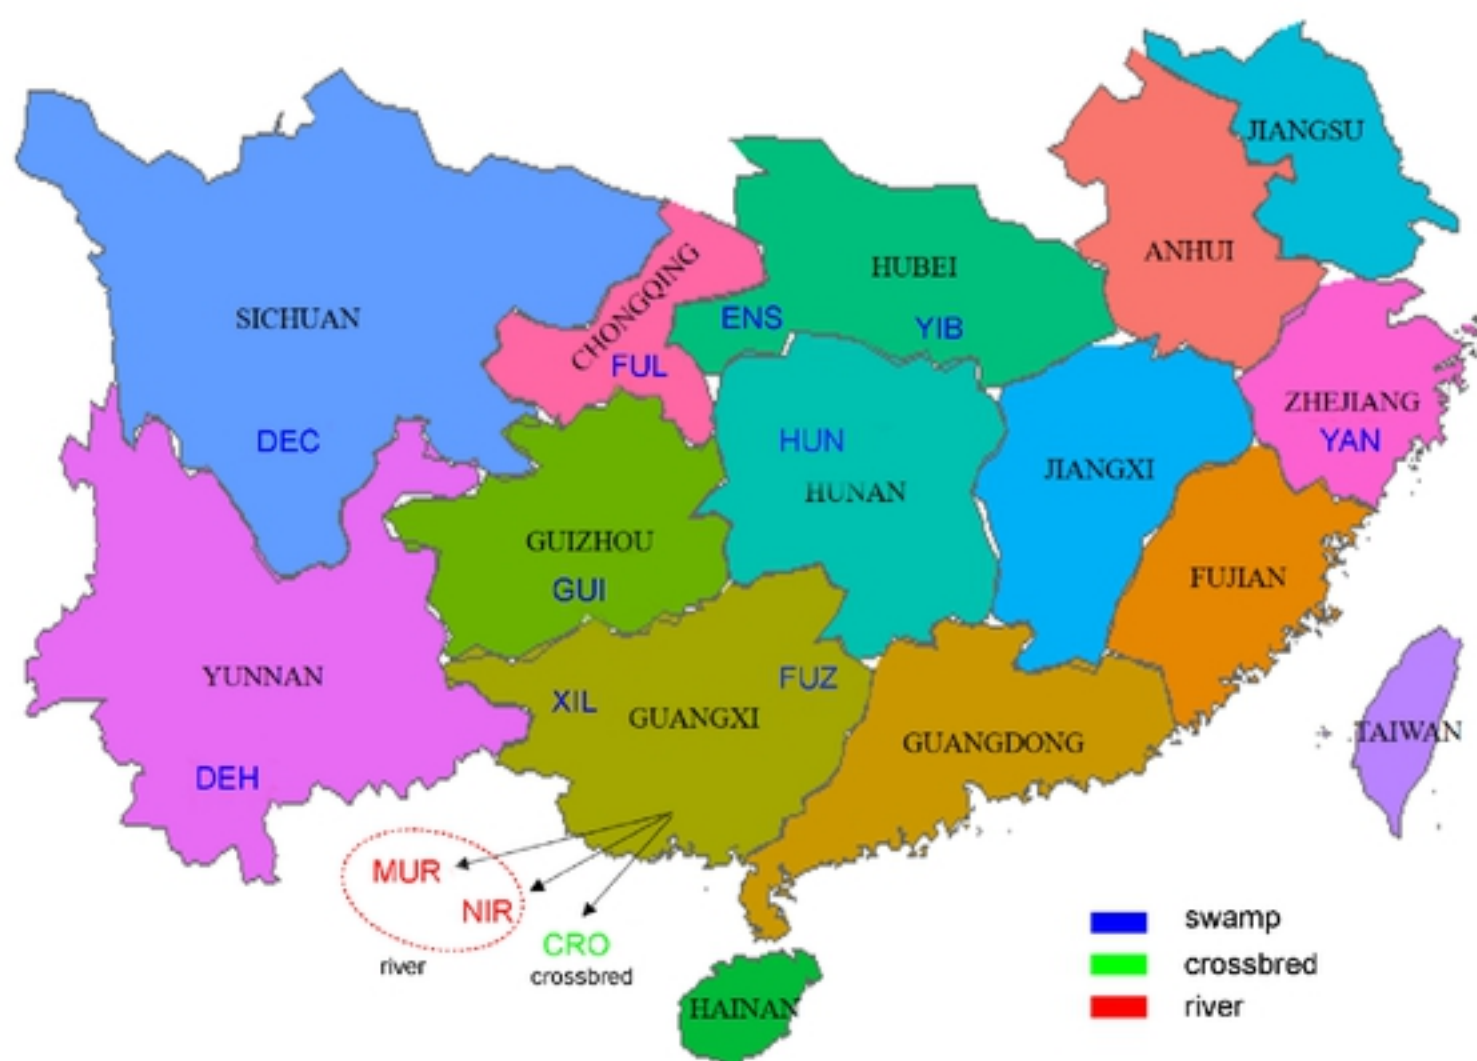

Source: https://www.biorxiv.org/content/10.1101/701045v1.full.pdf
